# Supplementary material
Source: Royal Society of Chemistry journal article supplement (doi:10.1039/d6cp00682e)
Supplement: d6cp00682e1.zip [file K17_DHB.pdf › K17_DHB.pdf]

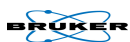

Instrument type autoflexTOF/TOF  
Acquisition method D:\Methods\flexControlMethods\RP\_100-1000\_MW\_Da.par  
File Name D:\Data\Specs\Analizy\_2025\_IV\_kw\JacewiczD\250909\K17\_DHB\0\_B15\1

Sample K17\_DHB\0\_B15\1  
Comment 1  
Comment 2

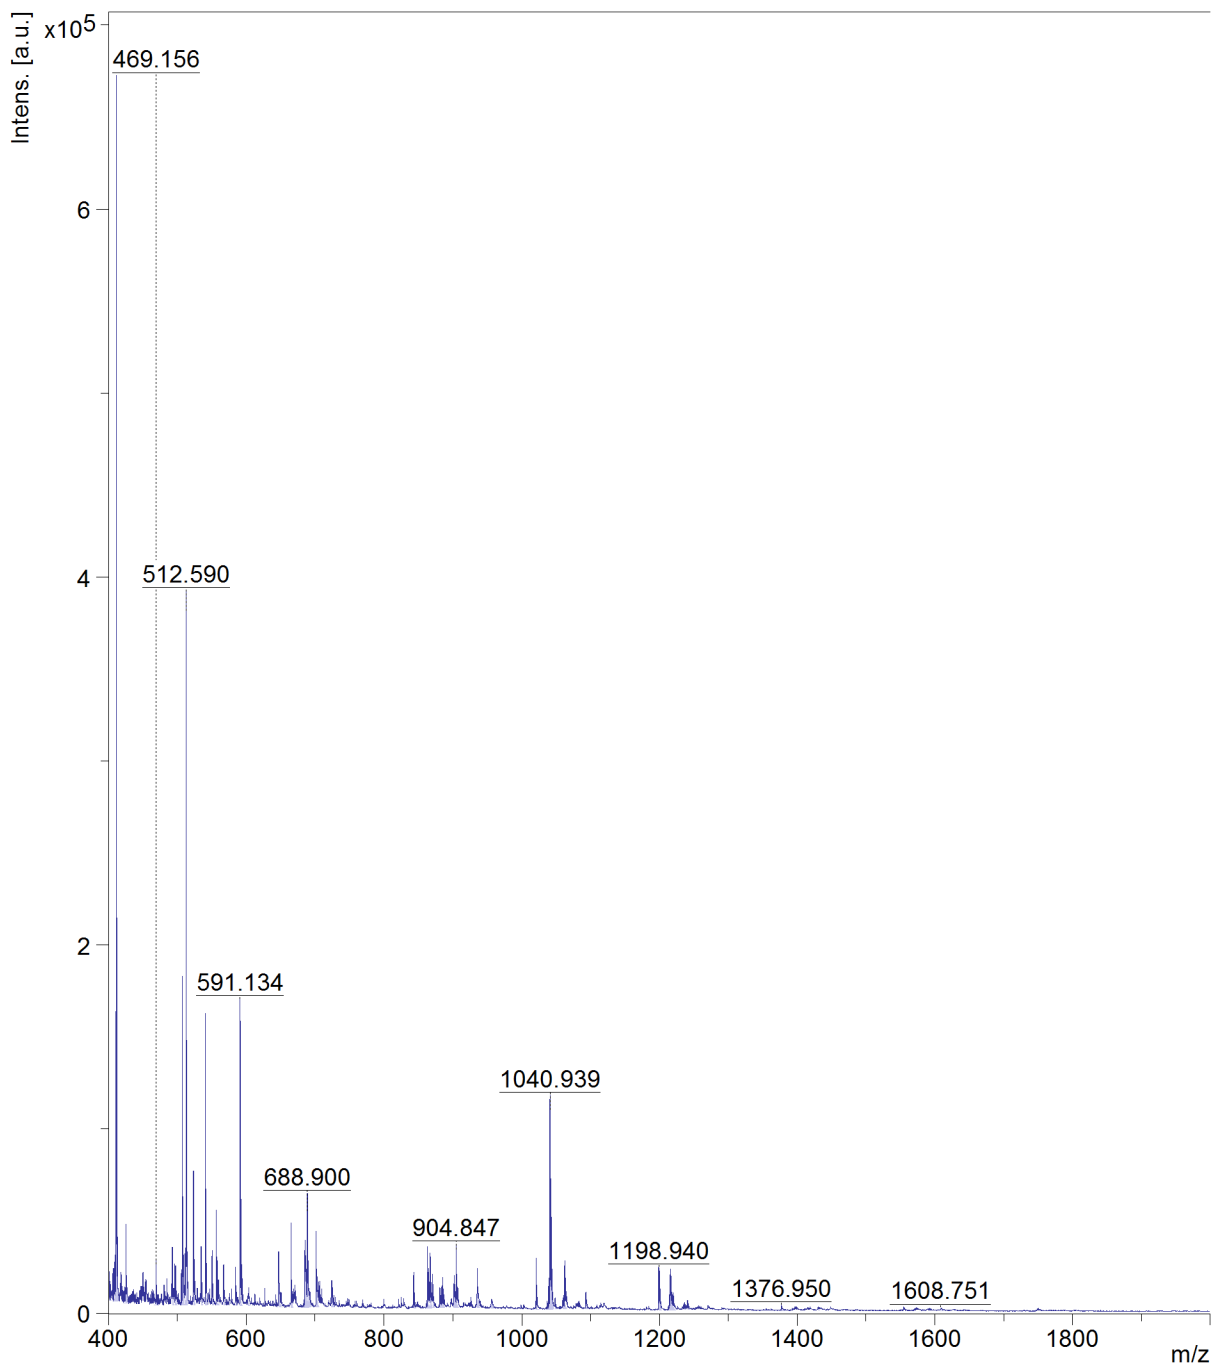

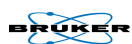

| m/z      | S/N | Quality | Fac. | Res.   | Intens. | Area |
|----------|-----|---------|------|--------|---------|------|
| 401.348  | 5   | 1386    | 855  | 23180  | 11378   |      |
| 407.192  | 6   | 1660    | 1270 | 24505  | 8907    |      |
| 409.201  | 8   | 938     | 1024 | 30423  | 14558   |      |
| 411.149  | 215 | 207634  | 1552 | 670411 | 253221  |      |
| 412.188  | 19  | 6426    | 1307 | 66589  | 30638   |      |
| 425.188  | 14  | 5060    | 1271 | 46607  | 21246   |      |
| 469.156  | 7   | 43739   | 1720 | 25739  | 9043    |      |
| 492.823  | 9   | 3362    | 1437 | 28811  | 13785   |      |
| 496.364  | 6   | 8302    | 1623 | 21771  | 8824    |      |
| 497.388  | 5   | 2900    | 1327 | 17877  | 8566    |      |
| 505.082  | 5   | 1263    | 1969 | 18108  | 5893    |      |
| 506.087  | 5   | 176     | 2138 | 17711  | 5169    |      |
| 507.089  | 63  | 89512   | 1640 | 172007 | 86533   |      |
| 511.025  | 10  | 1005    | 1345 | 29794  | 15793   |      |
| 512.590  | 142 | 114511  | 1915 | 381346 | 158115  |      |
| 523.348  | 27  | 39464   | 1547 | 75063  | 40346   |      |
| 534.541  | 10  | 11764   | 1628 | 31776  | 14955   |      |
| 540.605  | 60  | 26083   | 2061 | 160145 | 65202   |      |
| 550.526  | 10  | 10408   | 1641 | 29194  | 14147   |      |
| 556.596  | 19  | 17620   | 2158 | 52986  | 20394   |      |
| 558.489  | 8   | 1300    | 1730 | 24009  | 10674   |      |
| 567.160  | 6   | 1582    | 1388 | 20476  | 10824   |      |
| 584.610  | 7   | 5318    | 1974 | 20937  | 8507    |      |
| 591.134  | 71  | 33992   | 2206 | 169930 | 73590   |      |
| 603.025  | 4   | 209     | 1508 | 13481  | 6721    |      |
| 647.037  | 12  | 658     | 953  | 26986  | 30759   |      |
| 665.068  | 23  | 17420   | 2368 | 43923  | 20670   |      |
| 685.236  | 15  | 687     | 584  | 28458  | 55646   |      |
| 688.900  | 30  | 14517   | 1509 | 54897  | 44258   |      |
| 692.050  | 4   | 232     | 1565 | 10620  | 6297    |      |
| 701.478  | 21  | 15807   | 1415 | 39040  | 34107   |      |
| 703.245  | 5   | 193     | 1111 | 11740  | 8525    |      |
| 723.968  | 7   | 1007    | 766  | 14068  | 18464   |      |
| 843.038  | 16  | 25202   | 3052 | 20848  | 9705    |      |
| 862.954  | 28  | 29564   | 2267 | 33346  | 23902   |      |
| 864.992  | 14  | 6425    | 2432 | 18095  | 10921   |      |
| 866.854  | 24  | 10931   | 1756 | 28292  | 26097   |      |
| 870.566  | 16  | 32948   | 1942 | 19774  | 15270   |      |
| 880.945  | 10  | 1531    | 2174 | 13175  | 8395    |      |
| 882.905  | 7   | 744     | 2229 | 10452  | 6324    |      |
| 884.923  | 13  | 4170    | 2080 | 17025  | 12229   |      |
| 901.528  | 10  | 373     | 617  | 12940  | 28709   |      |
| 904.847  | 30  | 14532   | 2338 | 33958  | 24097   |      |
| 935.324  | 21  | 12151   | 1484 | 22725  | 26348   |      |
| 955.995  | 4   | 2326    | 498  | 5557   | 12290   |      |
| 1021.001 | 32  | 75154   | 3395 | 27729  | 16036   |      |
| 1036.999 | 5   | 1566    | 3674 | 5937   | 2343    |      |
| 1038.933 | 14  | 1463    | 3060 | 13117  | 8137    |      |
| 1039.968 | 15  | 125     | 3568 | 13481  | 6462    |      |
| 1040.939 | 140 | 120033  | 2711 | 109813 | 89158   |      |
| 1042.986 | 30  | 18926   | 1997 | 24820  | 26082   |      |
| 1048.484 | 6   | 1446    | 1928 | 6816   | 4829    |      |
| 1059.923 | 8   | 588     | 2545 | 8105   | 5529    |      |
| 1061.885 | 28  | 9458    | 2548 | 22515  | 19372   |      |
| 1062.942 | 24  | 414     | 5383 | 19813  | 6749    |      |
| 1093.101 | 11  | 11406   | 1772 | 9980   | 10191   |      |
| 1198.940 | 38  | 15073   | 2627 | 24479  | 26049   |      |
| 1213.952 | 12  | 479     | 5522 | 8946   | 3938    |      |
| 1215.898 | 36  | 29193   | 2237 | 22674  | 29086   |      |
| 1218.959 | 9   | 1426    | 4114 | 7176   | 3714    |      |
| 1219.918 | 10  | 3792    | 2633 | 7517   | 6727    |      |
| 1235.953 | 5   | 939     | 2329 | 4322   | 3419    |      |



| m/z      | S/N | Quality Fac. | Res. | Intens. | Area |
|----------|-----|--------------|------|---------|------|
| 1240.874 | 8   | 6391         | 2336 | 6113    | 5735 |
| 1376.950 | 5   | 2630         | 2624 | 3913    | 3917 |
| 1430.892 | 5   | 195          | 3855 | 3624    | 2380 |
| 1608.751 | 4   | 83.1         | 2958 | 2738    | 2250 |
