# Supplementary material
Source: Royal Society of Chemistry journal article supplement (doi:10.1039/d6cp00682e)
Supplement: d6cp00682e1.zip [file K18_DHB.pdf › K18_DHB.pdf]

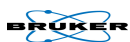

Instrument type autoflexTOF/TOF  
Acquisition method D:\Methods\flexControlMethods\RP\_100-1000\_MW\_Da.par  
File Name D:\Data\Specs\Analizy\_2025\_IV\_kw\JacewiczD\250909\K18\_DHB\0\_F15\1

Sample K18\_DHB\0\_F15\1  
Comment 1  
Comment 2

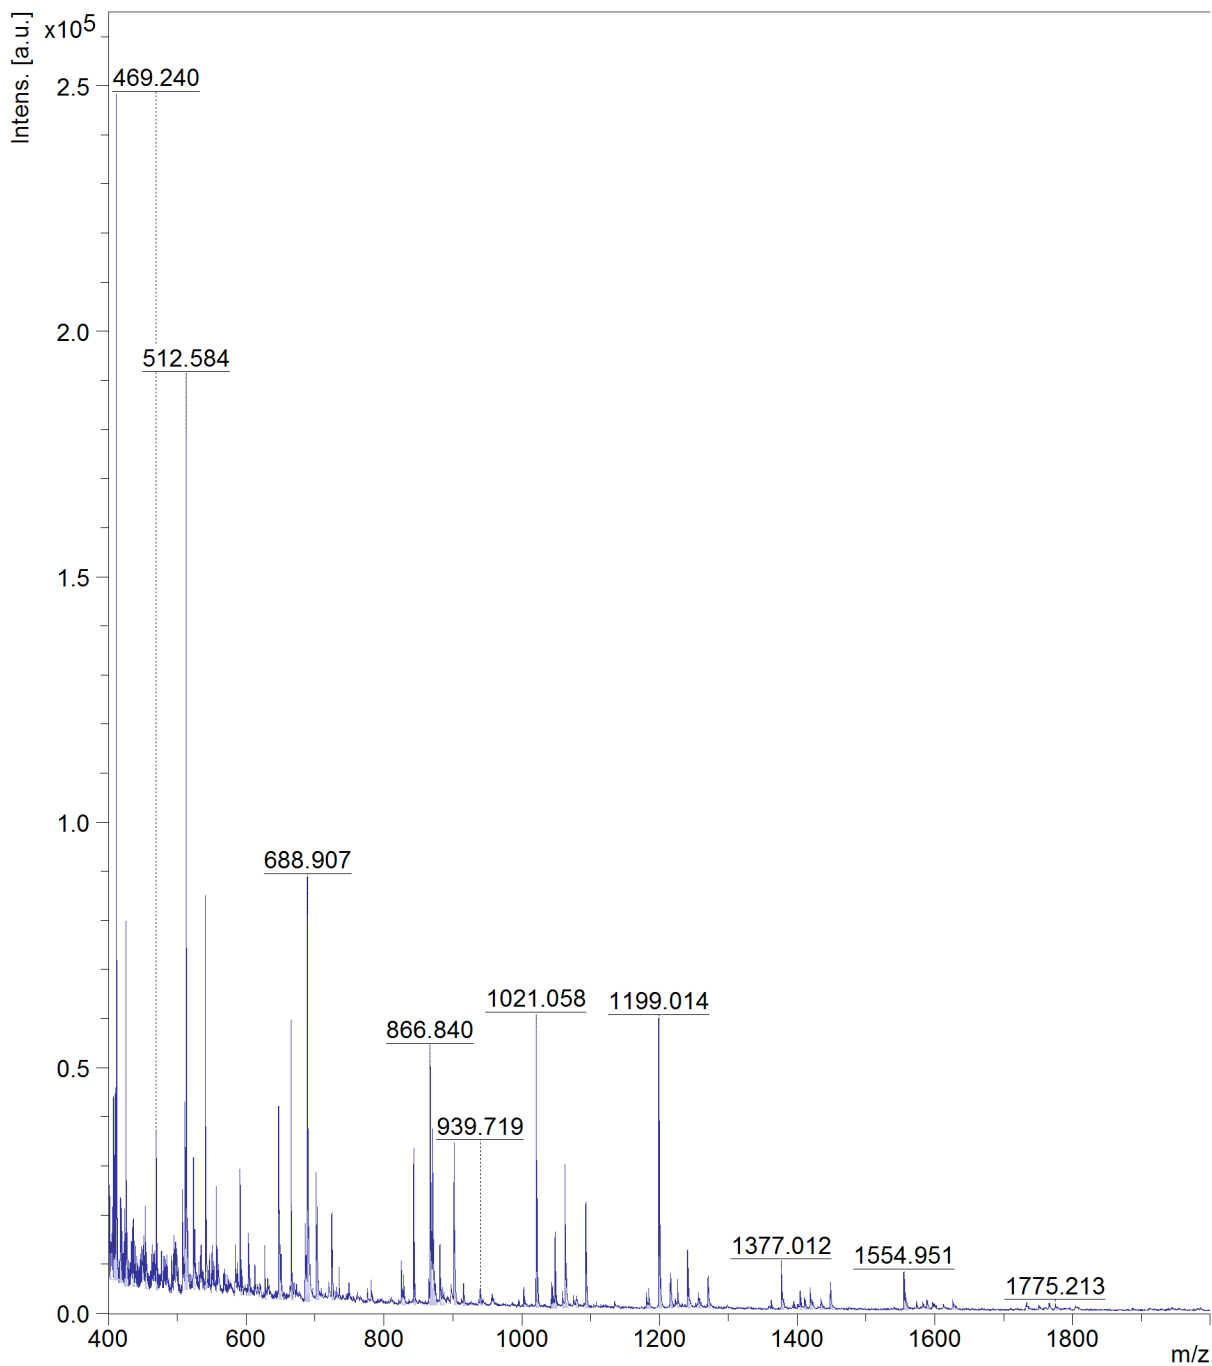

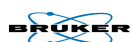

| m/z      | S/N | Quality | Fac. | Res.   | Intens. | Area |
|----------|-----|---------|------|--------|---------|------|
| 401.380  | 7   | 695     | 656  | 24768  | 17160   |      |
| 407.281  | 13  | 14547   | 1061 | 42728  | 21570   |      |
| 408.383  | 6   | 555     | 1352 | 24365  | 7602    |      |
| 409.322  | 12  | 4048    | 1015 | 39732  | 19458   |      |
| 411.143  | 90  | 46161   | 1637 | 252080 | 91064   |      |
| 417.228  | 6   | 432     | 435  | 21690  | 21594   |      |
| 423.258  | 6   | 1019    | 1079 | 22341  | 9935    |      |
| 425.281  | 28  | 33030   | 1197 | 80627  | 40042   |      |
| 435.311  | 4   | 205     | 524  | 16227  | 13777   |      |
| 453.342  | 4   | 300     | 571  | 15972  | 13506   |      |
| 469.240  | 13  | 86151   | 1217 | 35896  | 18946   |      |
| 511.106  | 17  | 3535    | 1109 | 43808  | 28692   |      |
| 512.584  | 76  | 35185   | 1880 | 179245 | 76057   |      |
| 523.414  | 10  | 6868    | 970  | 27795  | 21399   |      |
| 540.597  | 35  | 27287   | 2104 | 81966  | 32286   |      |
| 556.589  | 9   | 1412    | 2286 | 23553  | 7788    |      |
| 591.114  | 12  | 6876    | 2223 | 27771  | 11043   |      |
| 603.171  | 5   | 3219    | 887  | 14026  | 12604   |      |
| 627.148  | 5   | 1003    | 1985 | 11362  | 4777    |      |
| 647.044  | 22  | 1465    | 1117 | 38707  | 39957   |      |
| 665.117  | 36  | 96114   | 2279 | 57825  | 28096   |      |
| 685.617  | 7   | 311     | 654  | 13282  | 19934   |      |
| 688.907  | 54  | 64525   | 1549 | 81362  | 66570   |      |
| 701.674  | 14  | 1597    | 876  | 22180  | 28742   |      |
| 703.127  | 9   | 2918    | 1673 | 15225  | 10336   |      |
| 724.004  | 13  | 21971   | 1047 | 19880  | 21085   |      |
| 734.523  | 5   | 3263    | 2144 | 8697   | 3995    |      |
| 825.001  | 8   | 1703    | 1720 | 9496   | 7738    |      |
| 828.684  | 5   | 2095    | 2044 | 6755   | 4016    |      |
| 843.089  | 34  | 92294   | 2688 | 31836  | 18191   |      |
| 865.061  | 6   | 171     | 2168 | 6784   | 4229    |      |
| 866.840  | 57  | 26240   | 1859 | 49358  | 47092   |      |
| 869.242  | 9   | 320     | 1170 | 9001   | 9550    |      |
| 870.584  | 37  | 41266   | 1808 | 31954  | 29072   |      |
| 874.465  | 4   | 1096    | 959  | 4935   | 5593    |      |
| 881.044  | 13  | 6112    | 1667 | 12522  | 12096   |      |
| 885.323  | 4   | 104     | 2491 | 4969   | 2597    |      |
| 901.691  | 40  | 36212   | 1403 | 32758  | 37630   |      |
| 915.478  | 5   | 5385    | 1402 | 5519   | 4613    |      |
| 939.719  | 4   | 1397    | 1064 | 4370   | 4772    |      |
| 1002.962 | 6   | 1251    | 2037 | 4589   | 3896    |      |
| 1021.058 | 104 | 214357  | 2883 | 57917  | 41372   |      |
| 1043.021 | 8   | 3471    | 2984 | 5562   | 3316    |      |
| 1044.829 | 6   | 701     | 1720 | 4282   | 4414    |      |
| 1048.460 | 26  | 35561   | 2773 | 14868  | 10904   |      |
| 1059.082 | 4   | 469     | 1536 | 3465   | 3724    |      |
| 1062.867 | 55  | 57008   | 2556 | 29107  | 25968   |      |
| 1078.681 | 4   | 261     | 1723 | 3173   | 3156    |      |
| 1093.099 | 39  | 33158   | 1887 | 20695  | 23519   |      |
| 1180.921 | 7   | 1317    | 2112 | 3762   | 4108    |      |
| 1184.514 | 6   | 1295    | 1854 | 3543   | 3604    |      |
| 1199.014 | 140 | 397502  | 2893 | 59406  | 56892   |      |
| 1216.023 | 17  | 32881   | 1808 | 7898   | 11675   |      |
| 1226.437 | 11  | 2993    | 2362 | 5421   | 5177    |      |
| 1240.850 | 27  | 19867   | 2556 | 11864  | 13453   |      |
| 1256.708 | 4   | 491     | 597  | 2258   | 6318    |      |
| 1270.771 | 15  | 5603    | 1892 | 6642   | 8929    |      |
| 1377.012 | 25  | 50839   | 2814 | 9337   | 11521   |      |
| 1404.382 | 8   | 1876    | 2269 | 3603   | 4466    |      |
| 1410.743 | 5   | 1971    | 1508 | 2344   | 3817    |      |
| 1418.828 | 10  | 1092    | 2022 | 3947   | 6415    |      |
| 1434.395 | 4   | 806     | 908  | 1811   | 4469    |      |

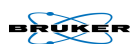

| m/z      | S/N | Quality Fac. | Res. | Intens. | Area  |
|----------|-----|--------------|------|---------|-------|
| 1448.462 | 14  | 5637         | 2117 | 5317    | 7939  |
| 1554.951 | 22  | 19647        | 2696 | 7064    | 11429 |
| 1558.504 | 4   | 1300         | 2312 | 1971    | 2610  |
| 1588.423 | 6   | 2467         | 1803 | 2248    | 3841  |
| 1626.167 | 5   | 422          | 1291 | 1656    | 3796  |
| 1775.213 | 4   | 147          | 3093 | 1454    | 1974  |
