# Supplementary material
Source: Royal Society of Chemistry journal article supplement (doi:10.1039/d6cp00682e)
Supplement: d6cp00682e1.zip [file K19_DHB.pdf › K19_DHB.pdf]

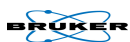

Instrument type autoflexTOF/TOF  
Acquisition method D:\Methods\flexControlMethods\RP\_100-1000\_MW\_Da.par  
File Name D:\Data\Specs\Analizy\_2025\_IV\_kw\JacewiczD\250909\K19\_DHB\0\_H15\1

Sample K19\_DHB\0\_H15\1  
Comment 1  
Comment 2

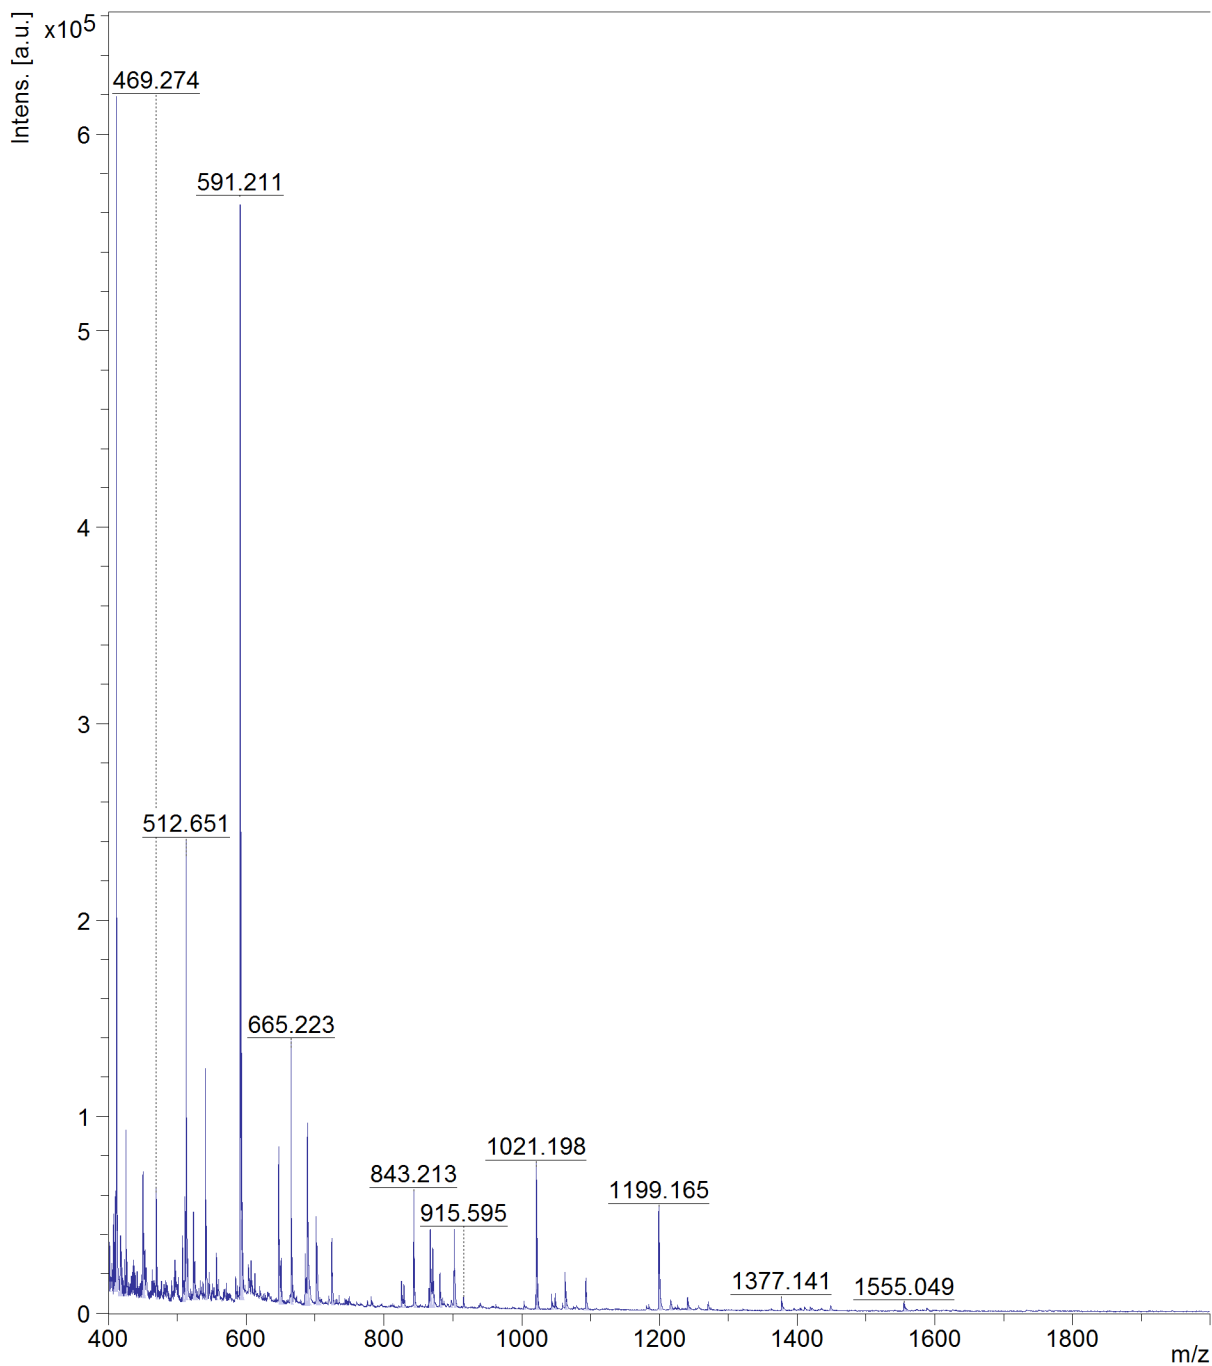

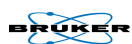

| m/z      | S/N | Quality | Fac. | Res.   | Intens. | Area |
|----------|-----|---------|------|--------|---------|------|
| 401.427  | 6   | 2189    | 762  | 35601  | 19880   |      |
| 407.333  | 9   | 12325   | 1209 | 50721  | 19793   |      |
| 409.352  | 10  | 710     | 1088 | 54514  | 24217   |      |
| 411.221  | 147 | 47956   | 1218 | 628996 | 310225  |      |
| 417.248  | 6   | 733     | 370  | 34757  | 40534   |      |
| 423.313  | 5   | 650     | 1151 | 27814  | 10390   |      |
| 425.325  | 21  | 6477    | 1254 | 93636  | 42422   |      |
| 450.157  | 13  | 1728    | 435  | 57969  | 79250   |      |
| 469.274  | 14  | 47294   | 1293 | 60833  | 30194   |      |
| 507.316  | 8   | 2373    | 857  | 36139  | 28634   |      |
| 511.156  | 15  | 1952    | 1136 | 62384  | 38502   |      |
| 512.651  | 61  | 18670   | 1449 | 232202 | 129859  |      |
| 524.267  | 5   | 243     | 247  | 21699  | 50814   |      |
| 540.670  | 31  | 22197   | 1557 | 116437 | 63934   |      |
| 556.663  | 6   | 1390    | 1445 | 25910  | 12851   |      |
| 591.211  | 184 | 55659   | 1486 | 567455 | 377585  |      |
| 593.256  | 23  | 4226    | 1068 | 77739  | 69476   |      |
| 647.159  | 27  | 2834    | 1010 | 73123  | 82509   |      |
| 650.912  | 6   | 791     | 1069 | 19300  | 13235   |      |
| 665.223  | 55  | 127124  | 1775 | 134558 | 83378   |      |
| 685.707  | 8   | 335     | 617  | 21484  | 34203   |      |
| 689.029  | 35  | 4631    | 1080 | 84440  | 97592   |      |
| 701.807  | 13  | 1152    | 547  | 32415  | 69702   |      |
| 724.135  | 14  | 7893    | 881  | 34524  | 41963   |      |
| 825.126  | 9   | 1635    | 1472 | 14839  | 14105   |      |
| 828.827  | 8   | 4281    | 1758 | 13100  | 9145    |      |
| 843.213  | 46  | 254775  | 2080 | 61483  | 45207   |      |
| 865.208  | 8   | 623     | 1836 | 12065  | 8502    |      |
| 866.955  | 30  | 7313    | 1469 | 38267  | 44249   |      |
| 870.709  | 22  | 21921   | 1534 | 28720  | 28836   |      |
| 881.149  | 15  | 12858   | 1571 | 19206  | 18961   |      |
| 897.093  | 4   | 235     | 1574 | 7062   | 5506    |      |
| 901.817  | 36  | 43423   | 1298 | 41444  | 50192   |      |
| 915.595  | 5   | 3832    | 1415 | 7678   | 6271    |      |
| 1003.126 | 5   | 632     | 1612 | 5069   | 4581    |      |
| 1019.136 | 5   | 47.7    | 1664 | 5200   | 4717    |      |
| 1021.198 | 105 | 216237  | 2240 | 73803  | 66998   |      |
| 1043.140 | 11  | 1149    | 1862 | 8937   | 9232    |      |
| 1048.586 | 12  | 6442    | 2095 | 9393   | 7747    |      |
| 1063.006 | 28  | 38063   | 1970 | 19618  | 21354   |      |
| 1093.235 | 25  | 24208   | 1672 | 16746  | 20181   |      |
| 1184.651 | 5   | 1576    | 1688 | 3654   | 3470    |      |
| 1199.165 | 103 | 413381  | 2275 | 53577  | 64597   |      |
| 1216.141 | 11  | 9436    | 1660 | 6565   | 9551    |      |
| 1226.552 | 5   | 1083    | 1712 | 3641   | 3480    |      |
| 1241.014 | 6   | 391     | 528  | 3591   | 12099   |      |
| 1270.914 | 8   | 2498    | 1729 | 5221   | 6533    |      |
| 1377.141 | 15  | 2696    | 2215 | 7124   | 10513   |      |
| 1419.006 | 4   | 386     | 1182 | 2407   | 4451    |      |
| 1448.588 | 7   | 4028    | 1989 | 3646   | 4887    |      |
| 1555.049 | 12  | 1958    | 2372 | 4752   | 7849    |      |
