# Supplementary material
Source: Royal Society of Chemistry journal article supplement (doi:10.1039/d6cp00682e)
Supplement: d6cp00682e1.zip [file K20_DHB.pdf › K20_DHB.pdf]

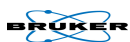

Instrument type autoflexTOF/TOF  
Acquisition method D:\Methods\flexControlMethods\RP\_100-1000\_MW\_Da.par  
File Name D:\Data\Specs\Analizy\_2025\_IV\_kw\JacewiczD\250909\K20\_DHB\0\_J15\1

Sample K20\_DHB\0\_J15\1  
Comment 1  
Comment 2

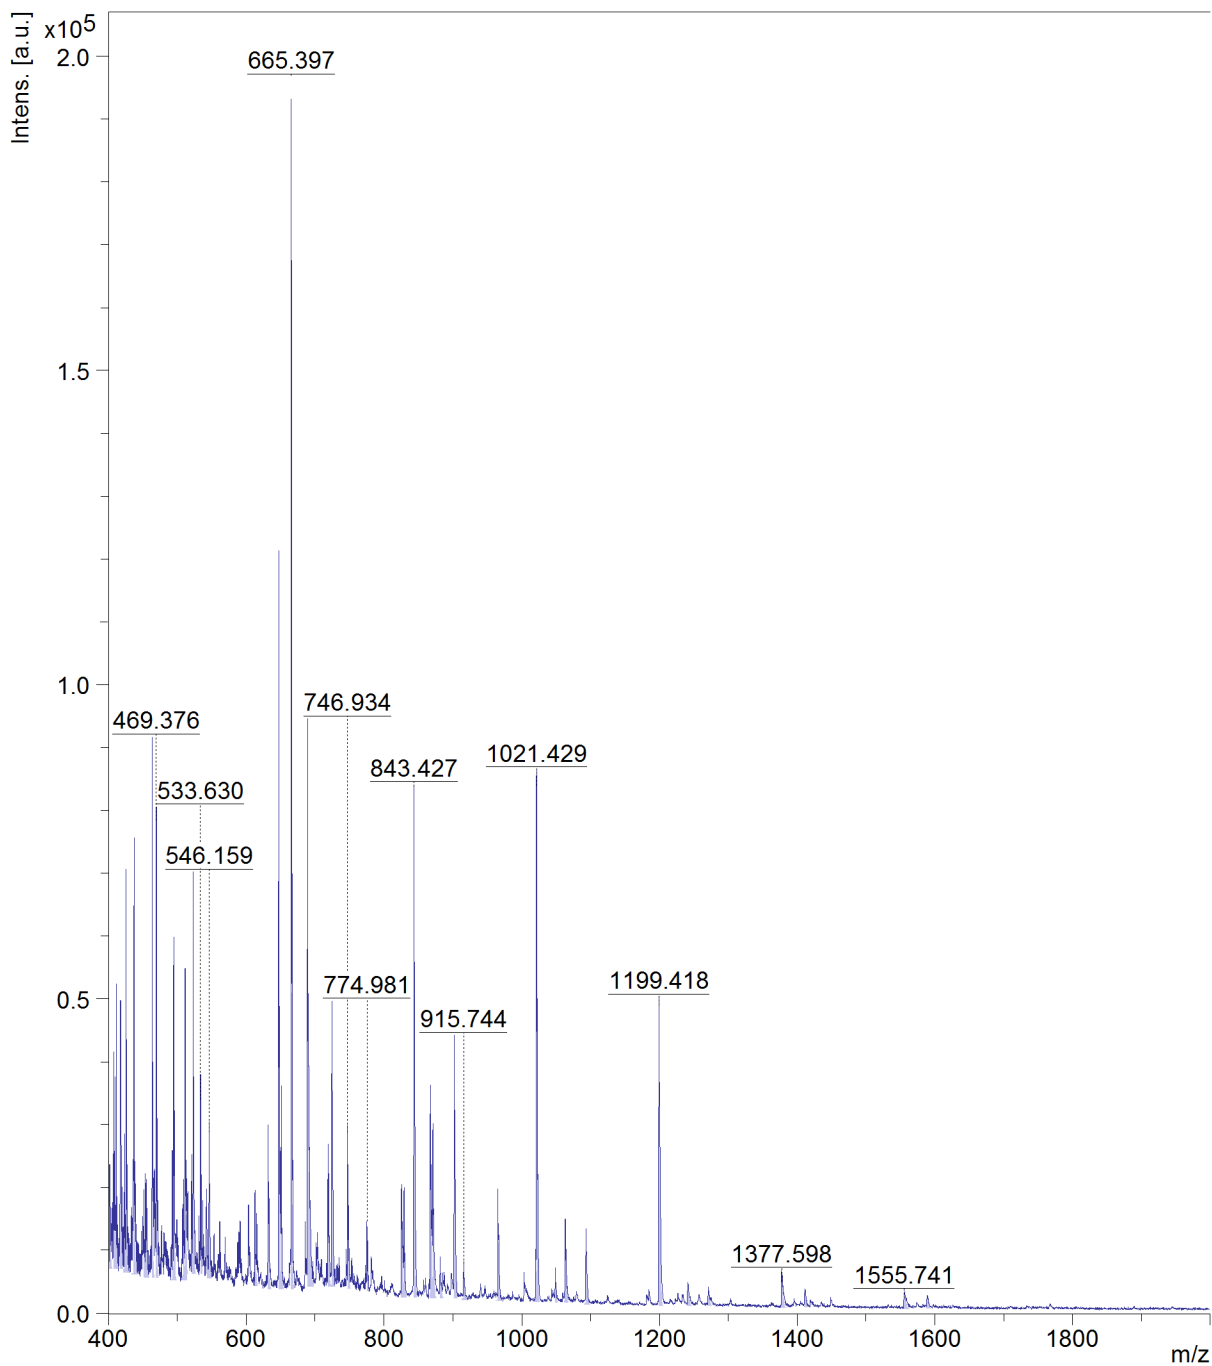

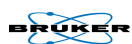

| m/z      | S/N | Quality | Fac. | Res.   | Intens. | Area |
|----------|-----|---------|------|--------|---------|------|
| 401.641  | 4   | 385     | 384  | 21970  | 23250   |      |
| 407.458  | 9   | 2200    | 670  | 39121  | 29965   |      |
| 409.500  | 9   | 2081    | 1005 | 36211  | 15898   |      |
| 411.223  | 12  | 2302    | 1091 | 47168  | 23440   |      |
| 417.346  | 12  | 2380    | 373  | 45979  | 62416   |      |
| 423.346  | 6   | 1823    | 749  | 28713  | 17254   |      |
| 425.438  | 19  | 13121   | 880  | 71716  | 45302   |      |
| 436.345  | 16  | 5298    | 768  | 58879  | 47029   |      |
| 437.395  | 17  | 1059    | 1272 | 62848  | 28590   |      |
| 451.416  | 4   | 683     | 815  | 18854  | 10800   |      |
| 453.469  | 4   | 1102    | 575  | 18925  | 16224   |      |
| 455.121  | 5   | 1594    | 892  | 19951  | 11994   |      |
| 463.572  | 23  | 3103    | 1020 | 79160  | 51324   |      |
| 469.376  | 23  | 13780   | 969  | 78194  | 54767   |      |
| 492.674  | 6   | 1207    | 955  | 23357  | 15196   |      |
| 494.748  | 18  | 4726    | 891  | 57930  | 49004   |      |
| 508.706  | 4   | 681     | 836  | 18509  | 12483   |      |
| 511.255  | 15  | 1964    | 794  | 51512  | 49293   |      |
| 520.725  | 6   | 848     | 1068 | 24260  | 15031   |      |
| 522.787  | 22  | 6952    | 954  | 68816  | 58142   |      |
| 533.630  | 10  | 2524    | 1198 | 33712  | 20669   |      |
| 542.255  | 4   | 5236    | 537  | 18620  | 19371   |      |
| 546.159  | 8   | 7054    | 604  | 28652  | 29824   |      |
| 612.818  | 4   | 234     | 619  | 14618  | 17507   |      |
| 631.802  | 12  | 3986    | 932  | 29901  | 31934   |      |
| 647.314  | 53  | 97185   | 1134 | 116792 | 112954  |      |
| 651.057  | 13  | 4541    | 974  | 30446  | 27419   |      |
| 665.397  | 97  | 230952  | 1196 | 196703 | 177759  |      |
| 689.157  | 47  | 8815    | 967  | 93411  | 119527  |      |
| 691.625  | 6   | 892     | 319  | 15098  | 43084   |      |
| 718.853  | 15  | 1069    | 1445 | 30345  | 25654   |      |
| 724.285  | 25  | 153537  | 791  | 48662  | 71030   |      |
| 746.934  | 15  | 6980    | 1296 | 28650  | 28066   |      |
| 774.981  | 7   | 6563    | 1358 | 14436  | 12222   |      |
| 825.449  | 11  | 1740    | 660  | 16326  | 33345   |      |
| 829.008  | 12  | 8369    | 1260 | 17195  | 17062   |      |
| 843.427  | 68  | 286510  | 1305 | 83538  | 96897   |      |
| 867.218  | 25  | 2376    | 879  | 29917  | 54035   |      |
| 869.670  | 5   | 81.0    | 1835 | 8351   | 4920    |      |
| 870.899  | 20  | 8639    | 1035 | 24336  | 36059   |      |
| 881.369  | 5   | 354     | 942  | 7720   | 10099   |      |
| 901.995  | 40  | 206001  | 1029 | 42580  | 65451   |      |
| 915.744  | 5   | 5840    | 1086 | 7575   | 8042    |      |
| 965.222  | 21  | 31743   | 1342 | 19447  | 26010   |      |
| 1019.388 | 6   | 73.7    | 1163 | 5523   | 7561    |      |
| 1021.429 | 123 | 305278  | 1434 | 83673  | 116290  |      |
| 1048.807 | 8   | 3485    | 1419 | 6591   | 7339    |      |
| 1063.324 | 13  | 794     | 628  | 8717   | 23672   |      |
| 1093.429 | 19  | 63665   | 1282 | 13155  | 20248   |      |
| 1199.418 | 99  | 290504  | 1512 | 48784  | 88157   |      |
| 1241.364 | 7   | 1301    | 1043 | 4073   | 8222    |      |
| 1271.093 | 5   | 582     | 926  | 3114   | 6720    |      |
| 1377.598 | 14  | 1256    | 931  | 4843   | 14875   |      |
| 1411.130 | 8   | 5083    | 1247 | 3334   | 7110    |      |
| 1555.741 | 7   | 719     | 744  | 2173   | 8414    |      |
| 1588.714 | 6   | 2990    | 1061 | 2006   | 5736    |      |
