# Supplementary material
Source: Royal Society of Chemistry journal article supplement (doi:10.1039/d6cp00682e)
Supplement: d6cp00682e1.zip [file K21_DHB.pdf › K21_DHB.pdf]

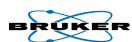

Instrument type autoflexTOF/TOF  
Acquisition method D:\Methods\flexControlMethods\RP\_100-1000\_MW\_Da.par  
File Name D:\Data\Specs\Analizy\_2025\_IV\_kw\JacewiczD\250909\K21\_DHB\0\_L15\1

Sample K21\_DHB\0\_L15\1  
Comment 1  
Comment 2

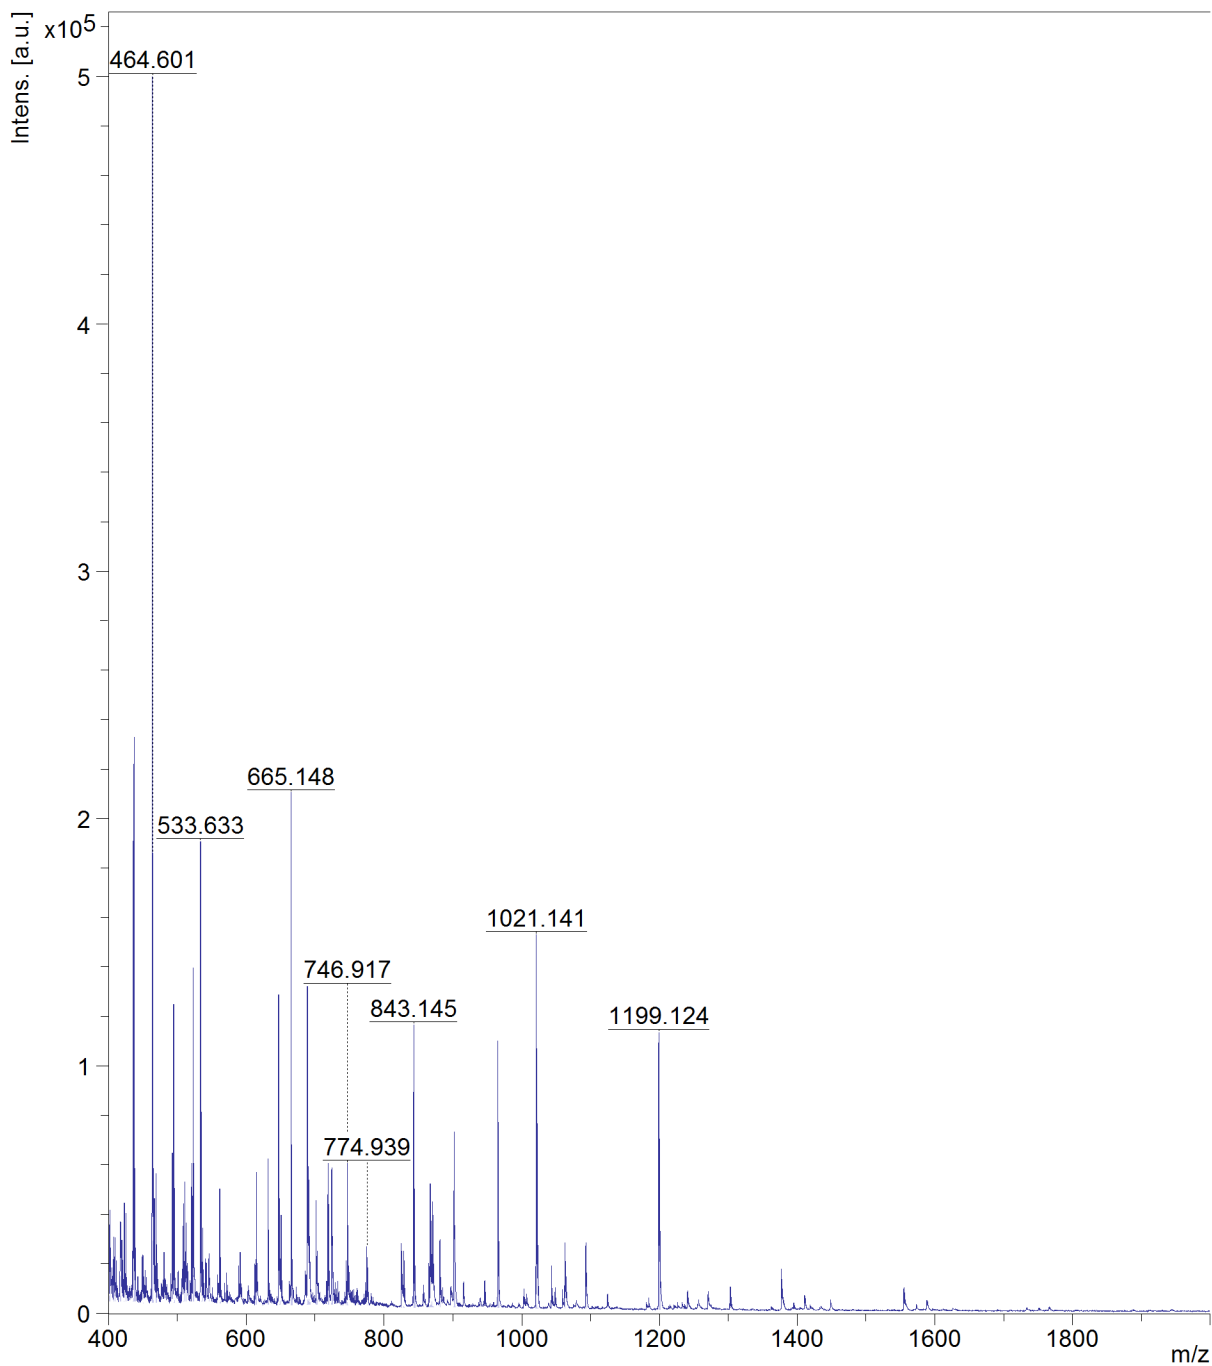

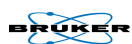

| m/z     | S/N | Quality Fac. | Res. | Intens. | Area   |
|---------|-----|--------------|------|---------|--------|
| 401.427 | 8   |              | 1483 | 35766   | 11281  |
| 401.956 | 10  |              | 1885 | 41642   | 11631  |
| 402.564 | 6   |              | 2284 | 26264   | 6657   |
| 407.203 | 5   |              | 2005 | 21801   | 4271   |
| 407.563 | 7   |              | 1880 | 30590   | 7659   |
| 409.226 | 7   |              | 1250 | 30492   | 10373  |
| 417.334 | 9   |              | 722  | 37001   | 24718  |
| 418.223 | 7   |              | 1630 | 30238   | 11543  |
| 419.205 | 7   |              | 1833 | 29657   | 9305   |
| 422.983 | 11  |              | 1456 | 44605   | 13882  |
| 425.213 | 10  |              | 1564 | 40317   | 13043  |
| 435.185 | 6   |              | 1712 | 25170   | 6782   |
| 436.170 | 61  |              | 1866 | 221980  | 63448  |
| 437.195 | 64  |              | 1849 | 232924  | 66410  |
| 438.202 | 15  |              | 1988 | 58402   | 15211  |
| 439.213 | 6   |              | 2020 | 26261   | 6700   |
| 449.160 | 5   |              | 2292 | 23338   | 5343   |
| 450.165 | 5   |              | 2102 | 23142   | 6265   |
| 463.157 | 11  |              | 2347 | 40717   | 8703   |
| 463.589 | 143 |              | 1864 | 500179  | 157867 |
| 464.601 | 52  |              | 1773 | 186090  | 64969  |
| 465.602 | 12  |              | 1844 | 45580   | 14444  |
| 466.666 | 12  |              | 1990 | 46509   | 13888  |
| 469.194 | 15  |              | 1872 | 56617   | 16519  |
| 470.218 | 5   |              | 1198 | 22702   | 8454   |
| 480.663 | 6   |              | 2093 | 24544   | 6116   |
| 492.670 | 18  |              | 2007 | 64878   | 19520  |
| 493.673 | 7   |              | 2045 | 27566   | 7897   |
| 494.684 | 36  |              | 1958 | 124887  | 38087  |
| 495.687 | 14  |              | 1880 | 50408   | 16954  |
| 508.681 | 12  |              | 2017 | 44318   | 13090  |
| 511.055 | 15  |              | 1855 | 53287   | 20002  |
| 512.644 | 10  |              | 2252 | 36402   | 10751  |
| 520.688 | 17  |              | 1969 | 60641   | 17260  |
| 521.696 | 7   |              | 2144 | 28437   | 7990   |
| 522.700 | 42  |              | 1995 | 139602  | 43190  |
| 523.706 | 17  |              | 1884 | 60635   | 25071  |
| 533.633 | 58  |              | 1961 | 190698  | 61096  |
| 534.641 | 24  |              | 1934 | 81251   | 27564  |
| 536.694 | 9   |              | 2048 | 34368   | 9595   |
| 540.653 | 6   |              | 2403 | 22002   | 4970   |
| 545.847 | 6   |              | 1887 | 23914   | 6344   |
| 545.972 | 6   |              | 2220 | 23339   | 6790   |
| 561.652 | 15  |              | 2076 | 50338   | 15438  |
| 562.657 | 6   |              | 2212 | 22532   | 6445   |
| 591.212 | 8   |              | 2291 | 24718   | 7165   |
| 614.031 | 7   |              | 2651 | 21758   | 6423   |
| 615.063 | 21  |              | 2313 | 57103   | 19495  |
| 631.710 | 24  |              | 2429 | 62284   | 19233  |
| 632.723 | 12  |              | 2497 | 33427   | 10356  |
| 647.096 | 54  |              | 2285 | 128872  | 46368  |
| 648.094 | 18  |              | 2405 | 46315   | 18000  |
| 649.137 | 8   |              | 2390 | 21812   | 8644   |
| 650.808 | 16  |              | 2370 | 39738   | 13084  |
| 665.148 | 91  |              | 2412 | 210458  | 67465  |
| 666.159 | 29  |              | 2454 | 68142   | 24126  |
| 667.149 | 8   |              | 3104 | 21742   | 5780   |
| 688.972 | 57  |              | 2143 | 132305  | 57438  |
| 689.966 | 26  |              | 2357 | 59216   | 29523  |
| 690.876 | 23  |              | 2099 | 53608   | 27519  |
| 691.840 | 13  |              | 2385 | 30954   | 16393  |
| 692.756 | 8   |              | 2140 | 20675   | 8757   |



| m/z      | S/N | Quality Fac. | Res. | Intens. | Area  |
|----------|-----|--------------|------|---------|-------|
| 701.578  | 19  |              | 2319 | 45576   | 16997 |
| 702.578  | 9   |              | 3038 | 22956   | 6657  |
| 703.081  | 10  |              | 2794 | 24926   | 8390  |
| 718.886  | 28  |              | 2328 | 60629   | 21870 |
| 719.883  | 20  |              | 2184 | 43939   | 17894 |
| 723.993  | 28  |              | 1314 | 58766   | 39316 |
| 724.945  | 14  |              | 1627 | 30764   | 18758 |
| 744.901  | 10  |              | 2542 | 21111   | 6358  |
| 746.917  | 31  |              | 2331 | 60570   | 22299 |
| 747.917  | 17  |              | 2352 | 35449   | 13027 |
| 774.939  | 15  |              | 2492 | 26883   | 8680  |
| 825.078  | 18  |              | 2652 | 28212   | 10675 |
| 828.740  | 16  |              | 2455 | 25058   | 10269 |
| 843.145  | 79  |              | 2684 | 116639  | 43932 |
| 844.151  | 33  |              | 2819 | 50271   | 20191 |
| 845.167  | 12  |              | 2988 | 19188   | 6778  |
| 865.085  | 13  |              | 2919 | 20102   | 6296  |
| 866.950  | 37  |              | 2300 | 52482   | 25313 |
| 867.924  | 26  |              | 2436 | 37201   | 18709 |
| 868.946  | 16  |              | 2490 | 23869   | 12063 |
| 870.642  | 32  |              | 2479 | 45007   | 21722 |
| 871.632  | 15  |              | 2630 | 22432   | 12088 |
| 881.056  | 21  |              | 2650 | 29895   | 11795 |
| 901.714  | 60  |              | 1676 | 73307   | 51185 |
| 902.694  | 28  |              | 1624 | 35520   | 24919 |
| 965.040  | 107 |              | 2828 | 110116  | 44893 |
| 966.044  | 74  |              | 2903 | 77238   | 32631 |
| 967.047  | 27  |              | 3014 | 29112   | 12283 |
| 1020.102 | 21  |              | 2917 | 18817   | 7507  |
| 1021.141 | 184 |              | 2787 | 153062  | 67379 |
| 1022.149 | 94  |              | 2883 | 78926   | 36004 |
| 1023.164 | 37  |              | 2945 | 31798   | 14831 |
| 1043.085 | 22  |              | 2946 | 19203   | 7263  |
| 1063.008 | 34  |              | 2595 | 28485   | 14299 |
| 1093.130 | 35  |              | 2287 | 28613   | 16151 |
| 1199.124 | 183 |              | 3090 | 113643  | 54598 |
| 1200.126 | 113 |              | 3132 | 70503   | 37107 |
| 1201.120 | 52  |              | 3063 | 33256   | 18951 |
