# Supplementary material
Source: Royal Society of Chemistry journal article supplement (doi:10.1039/d6cp00682e)
Supplement: d6cp00682e1.zip [file K22_DHB.pdf › K22_DHB.pdf]

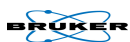

Instrument type autoflexTOF/TOF  
Acquisition method D:\Methods\flexControlMethods\RP\_100-1000\_MW\_Da.par  
File Name D:\Data\Specs\Analizy\_2025\_IV\_kw\JacewiczD\250909\K22\_DHB\0\_N15\1

Sample K22\_DHB\0\_N15\1  
Comment 1  
Comment 2

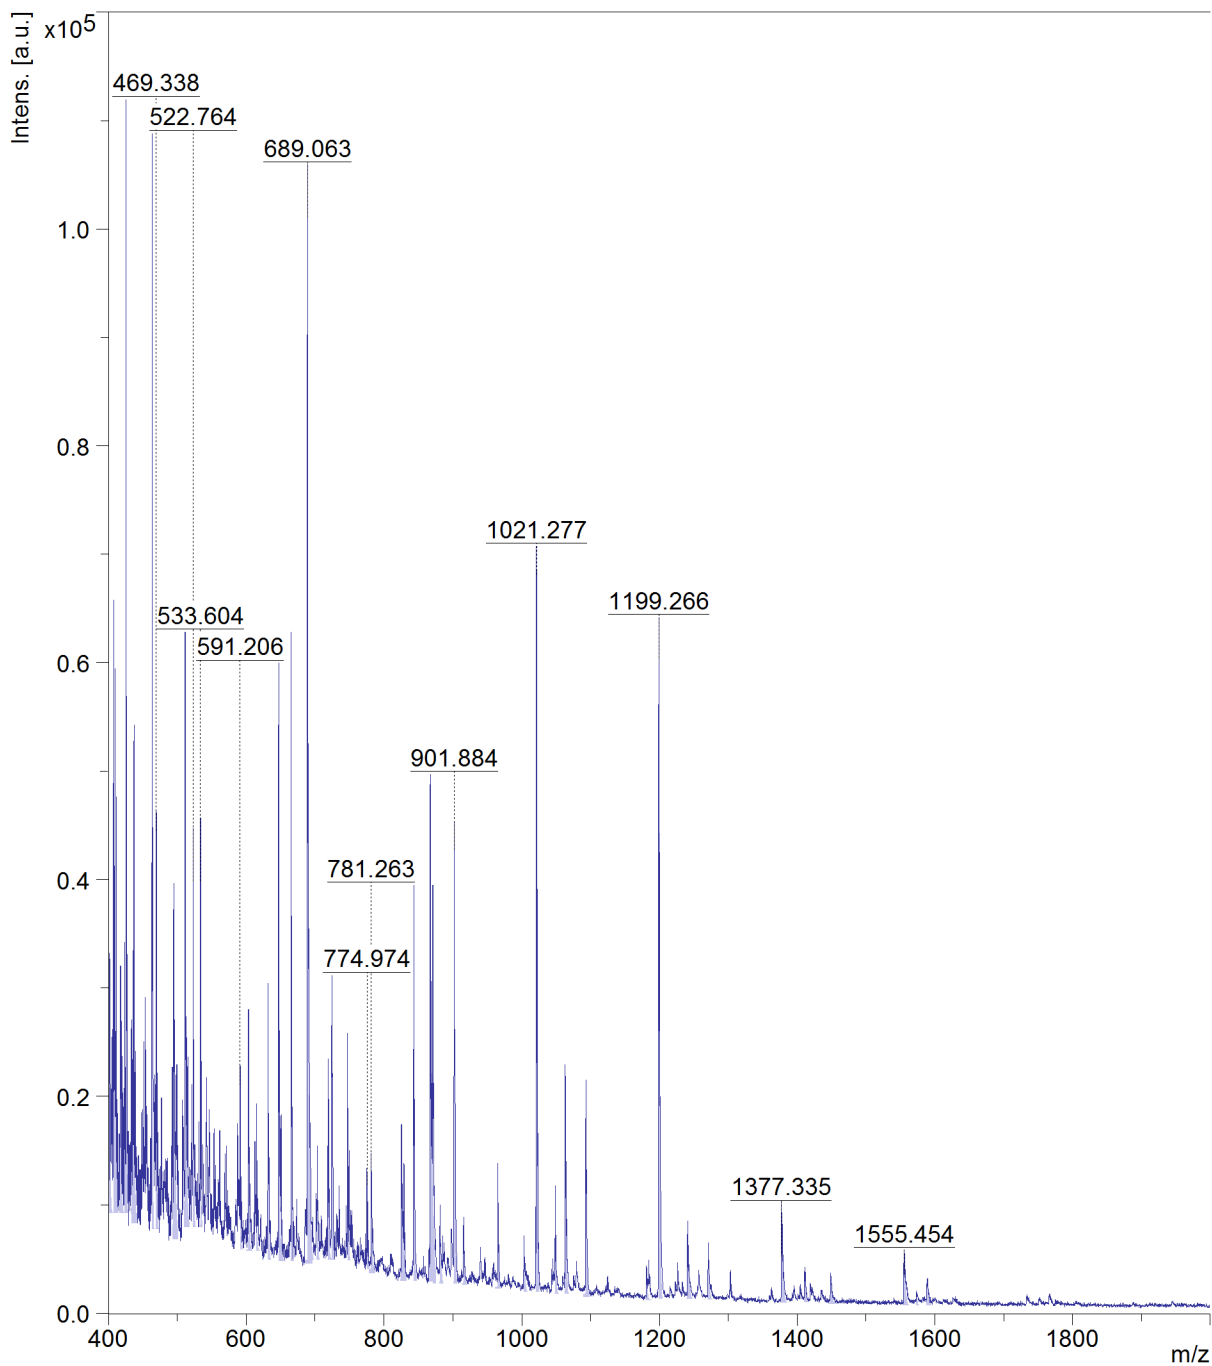

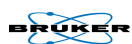

| m/z      | S/N | Quality | Fac. | Res.   | Intens. | Area |
|----------|-----|---------|------|--------|---------|------|
| 401.455  | 6   | 567     | 457  | 31312  | 29448   |      |
| 407.416  | 14  | 4482    | 648  | 62595  | 51533   |      |
| 409.363  | 12  | 5678    | 841  | 54481  | 35337   |      |
| 411.216  | 9   | 3262    | 976  | 44100  | 22459   |      |
| 417.411  | 5   | 258     | 300  | 27499  | 37409   |      |
| 423.350  | 7   | 1811    | 728  | 33971  | 21328   |      |
| 425.402  | 28  | 35756   | 922  | 113375 | 70844   |      |
| 433.350  | 5   | 1989    | 731  | 27242  | 15317   |      |
| 435.418  | 5   | 286     | 897  | 27364  | 11940   |      |
| 436.279  | 9   | 6078    | 801  | 43734  | 29482   |      |
| 437.290  | 10  | 3279    | 1431 | 45584  | 16749   |      |
| 463.559  | 22  | 576     | 813  | 85516  | 61025   |      |
| 469.338  | 10  | 13077   | 851  | 44392  | 31783   |      |
| 495.112  | 5   | 179     | 184  | 21111  | 60165   |      |
| 511.457  | 8   | 276     | 239  | 31518  | 78875   |      |
| 522.764  | 10  | 4354    | 901  | 39755  | 31487   |      |
| 533.604  | 10  | 2435    | 1269 | 39748  | 21009   |      |
| 591.206  | 5   | 2410    | 1437 | 20932  | 10672   |      |
| 603.309  | 8   | 7933    | 925  | 26785  | 24015   |      |
| 615.151  | 4   | 1379    | 1275 | 17475  | 9787    |      |
| 631.749  | 9   | 3586    | 1038 | 26804  | 23839   |      |
| 647.182  | 22  | 16619   | 1241 | 57792  | 50074   |      |
| 650.915  | 4   | 1324    | 829  | 14954  | 12141   |      |
| 665.270  | 25  | 75832   | 1418 | 62867  | 46193   |      |
| 689.063  | 43  | 32342   | 1097 | 101010 | 114633  |      |
| 692.081  | 4   | 354     | 264  | 12996  | 35092   |      |
| 703.339  | 4   | 951     | 779  | 13853  | 12833   |      |
| 718.949  | 8   | 1473    | 1271 | 22665  | 18603   |      |
| 724.195  | 12  | 85799   | 804  | 30314  | 40917   |      |
| 746.937  | 10  | 10418   | 1528 | 24082  | 18404   |      |
| 774.974  | 4   | 2604    | 1410 | 11712  | 8274    |      |
| 781.263  | 5   | 1825    | 902  | 12964  | 14368   |      |
| 825.559  | 5   | 792     | 308  | 8923   | 31470   |      |
| 828.838  | 5   | 795     | 2704 | 10267  | 4203    |      |
| 843.274  | 27  | 73046   | 1555 | 38895  | 36486   |      |
| 867.625  | 16  | 297     | 249  | 19129  | 110137  |      |
| 871.689  | 9   | 95.7    | 1224 | 14180  | 14258   |      |
| 881.308  | 4   | 297     | 748  | 7642   | 11541   |      |
| 901.884  | 35  | 74835   | 1089 | 42654  | 61270   |      |
| 915.591  | 4   | 5363    | 1125 | 7635   | 7597    |      |
| 965.104  | 11  | 26269   | 1736 | 12922  | 12528   |      |
| 1003.219 | 4   | 470     | 963  | 5489   | 7935    |      |
| 1021.277 | 84  | 147067  | 1759 | 68000  | 77486   |      |
| 1048.660 | 11  | 9067    | 1577 | 9648   | 10769   |      |
| 1063.118 | 27  | 27432   | 1591 | 20642  | 27747   |      |
| 1093.317 | 27  | 52987   | 1481 | 20133  | 27317   |      |
| 1181.196 | 4   | 768     | 1333 | 3396   | 4218    |      |
| 1199.266 | 115 | 267370  | 1908 | 60299  | 86680   |      |
| 1241.275 | 8   | 734     | 632  | 4160   | 13296   |      |
| 1271.012 | 8   | 1465    | 1268 | 4919   | 8857    |      |
| 1377.335 | 15  | 1093    | 741  | 5134   | 20476   |      |
| 1411.085 | 7   | 4747    | 1259 | 3250   | 6236    |      |
| 1448.572 | 5   | 1172    | 957  | 2286   | 5730    |      |
| 1555.454 | 12  | 879     | 1002 | 3488   | 12154   |      |
| 1573.061 | 5   | 82.3    | 3778 | 2130   | 1597    |      |
| 1588.645 | 7   | 4195    | 1149 | 2257   | 6187    |      |
