# Supplementary material
Source: Royal Society of Chemistry journal article supplement (doi:10.1039/d6cp00682e)
Supplement: d6cp00682e2.pdf [file d6cp00682e2.pdf]

## Electronic Supporting Information

### Single-Crystal XRD Characterization, Physicochemical Properties and Catalytic Activity of Rhodium(III/IV) Coordination Compounds

*Kacper Pobłocki<sup>\*a,b</sup>, Marzena Białek<sup>b</sup>, Katarzyna N. Jarzemska<sup>c</sup>, Radosław Kamiński<sup>c</sup>,*

*Dagmara Jacewicz<sup>\*a</sup>*

<sup>a</sup>Department of Environmental Technology, University of Gdansk, Faculty of Chemistry, 63 Wita Stwosza, 80-308 Gdansk, Poland

<sup>b</sup>Department of Chemical Technology and Polymer Chemistry, Institute of Chemistry, University of Opole, Oleska 48, 45-052 Opole, Poland

<sup>c</sup> University of Warsaw, Faculty of Chemistry, Żwirki i Wigury 101, 02-089 Warsaw, Poland

## Legend

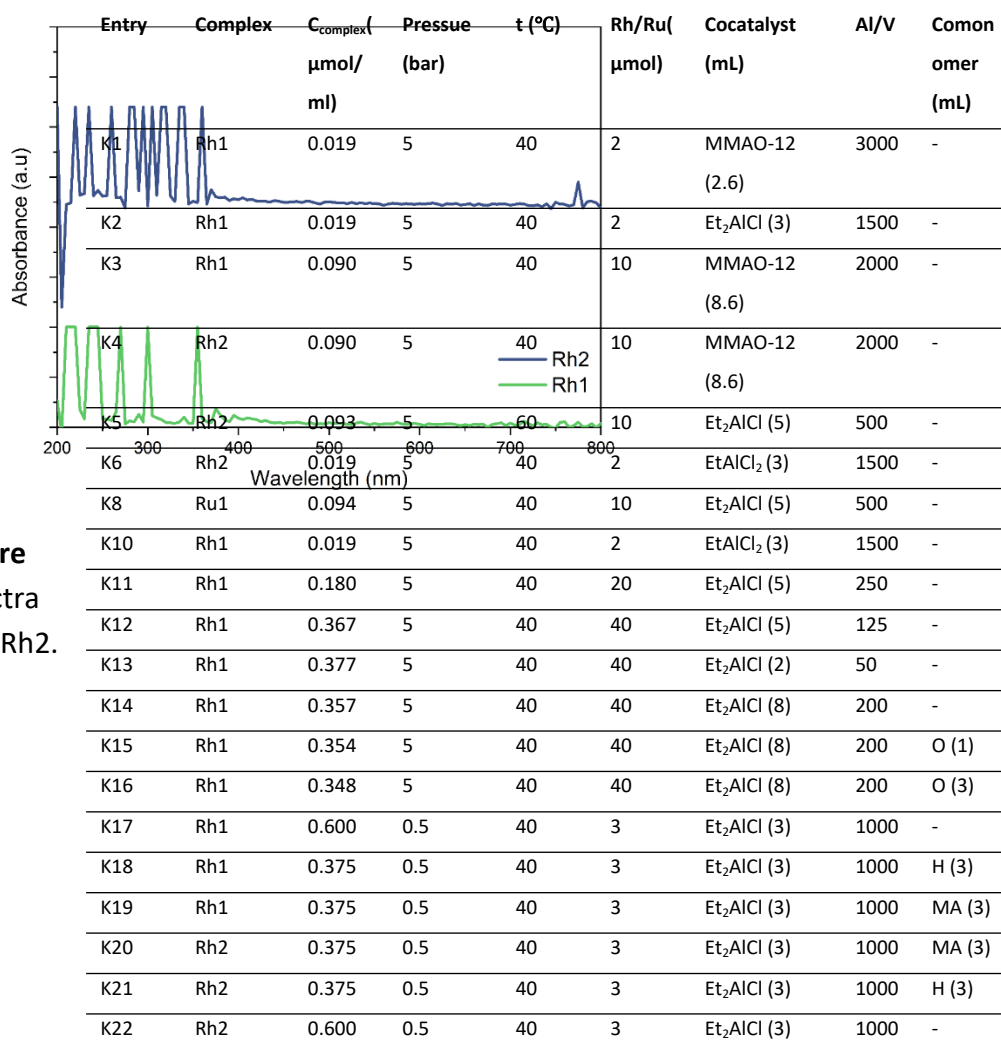

Figure spectra and Rh2.

S1. DRS of Rh1

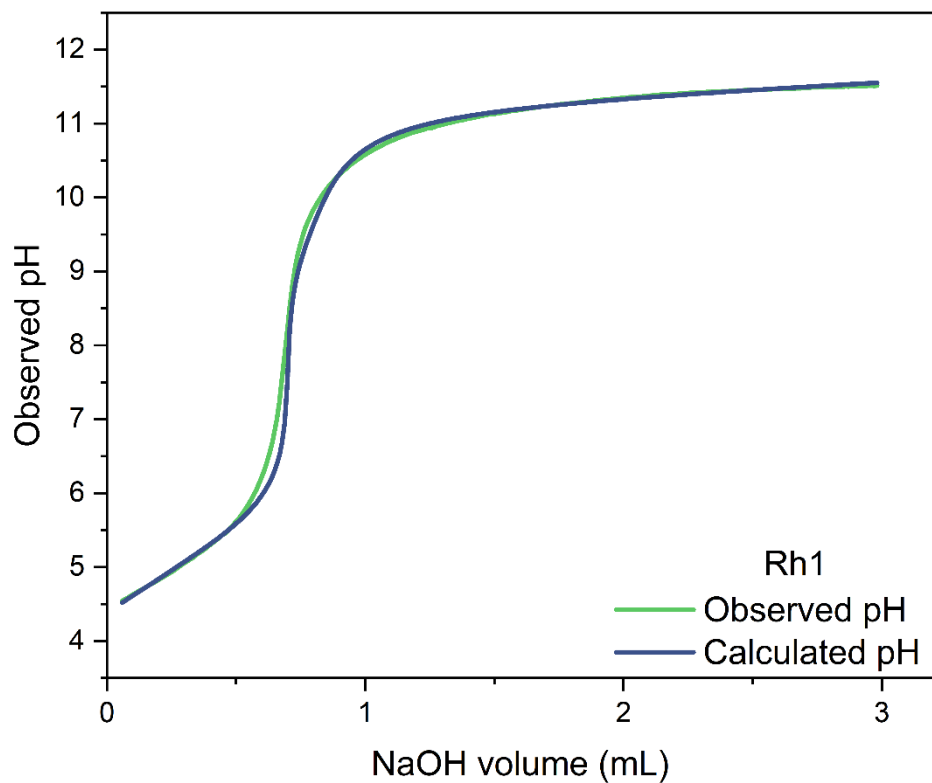

Figure S2. Potentiometric titration curve of Rh1 complex formation.

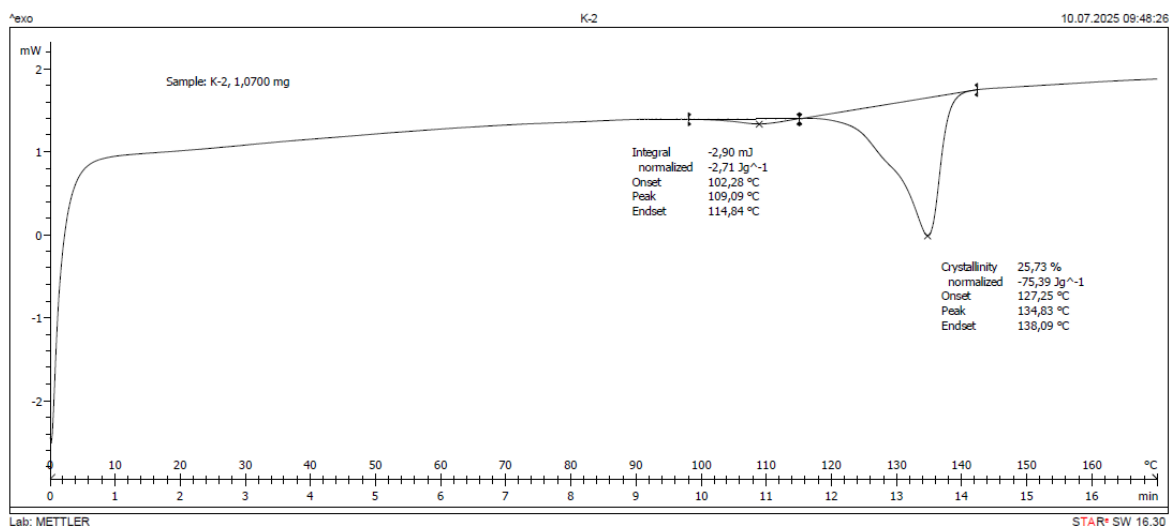

Figure S3. DSC curve of K2.

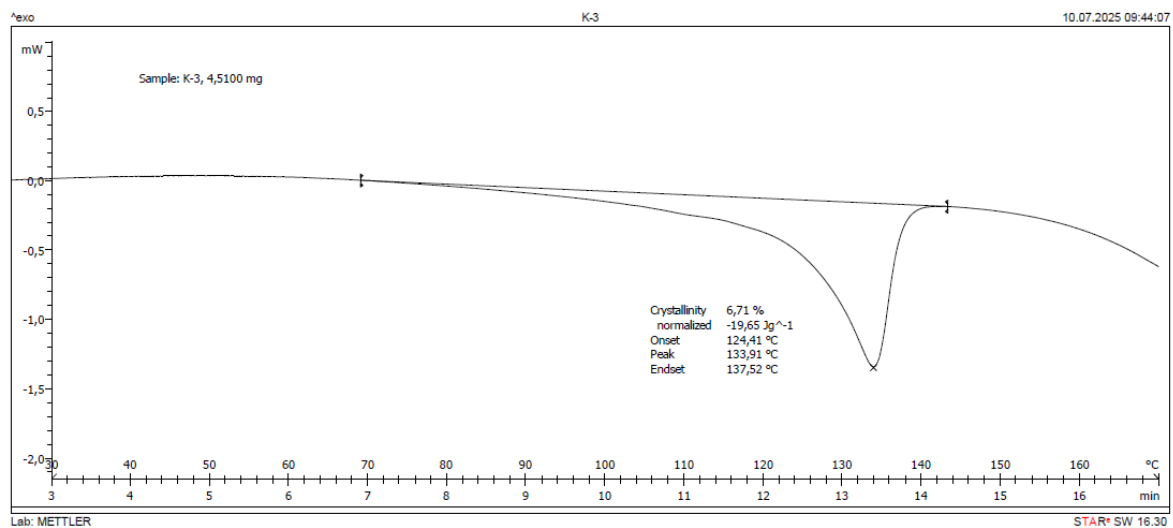

Figure S4. DSC curve of K3.

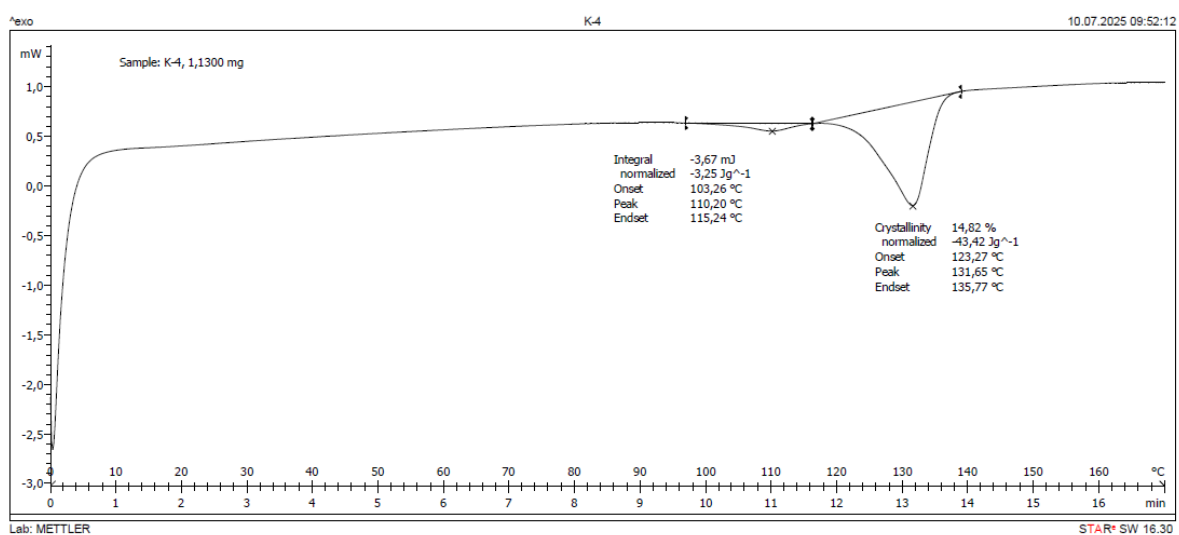

Figure S5. DSC curve of K4.

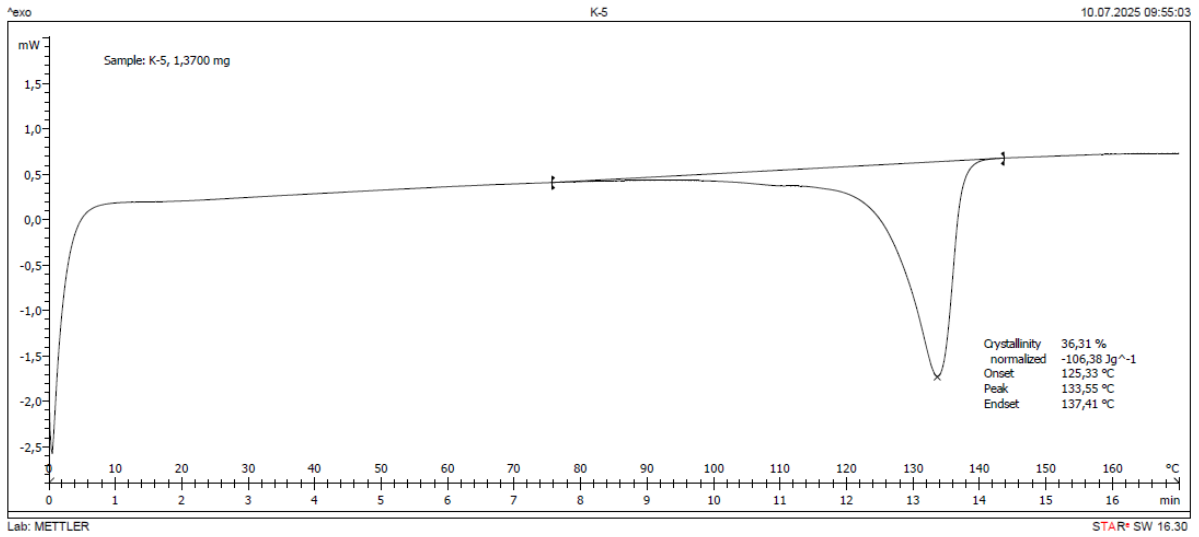

**Figure S6.** DSC curve of K5.

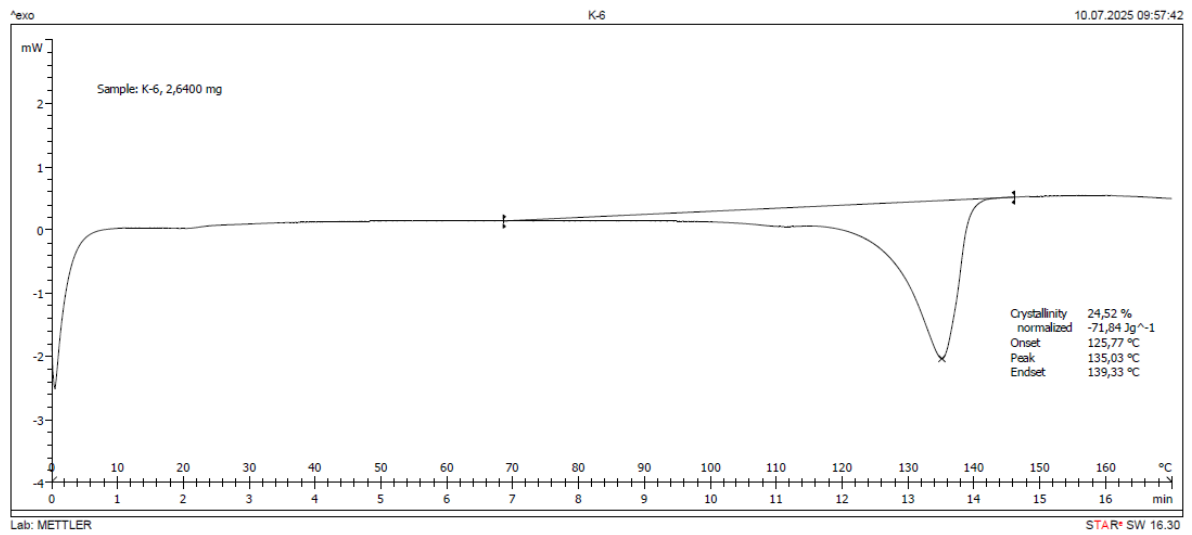

**Figure S7.** DSC curve of K6.

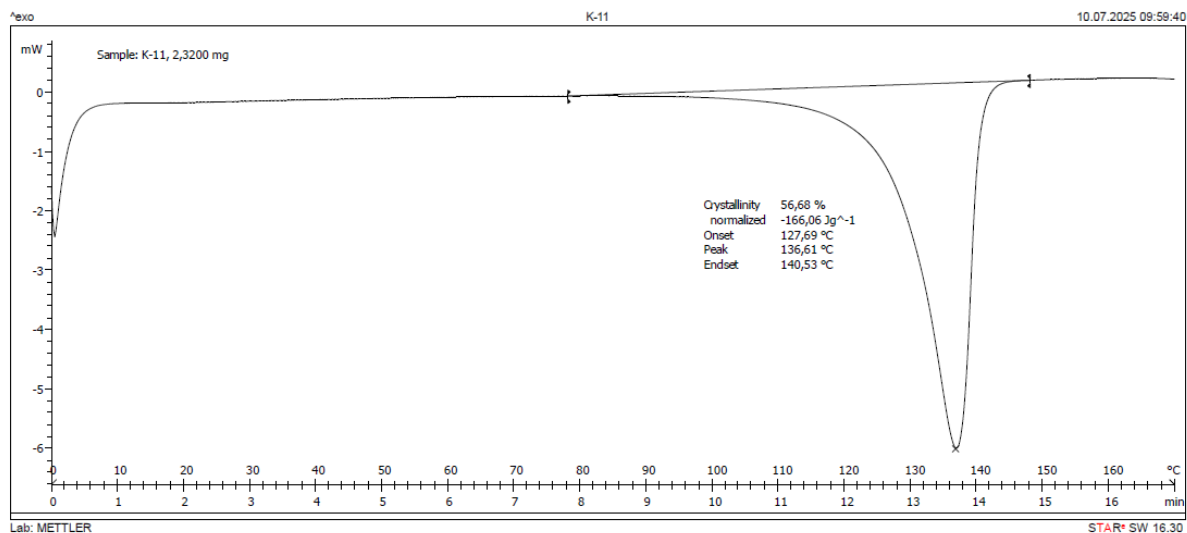

Figure S8. DSC curve of K11.

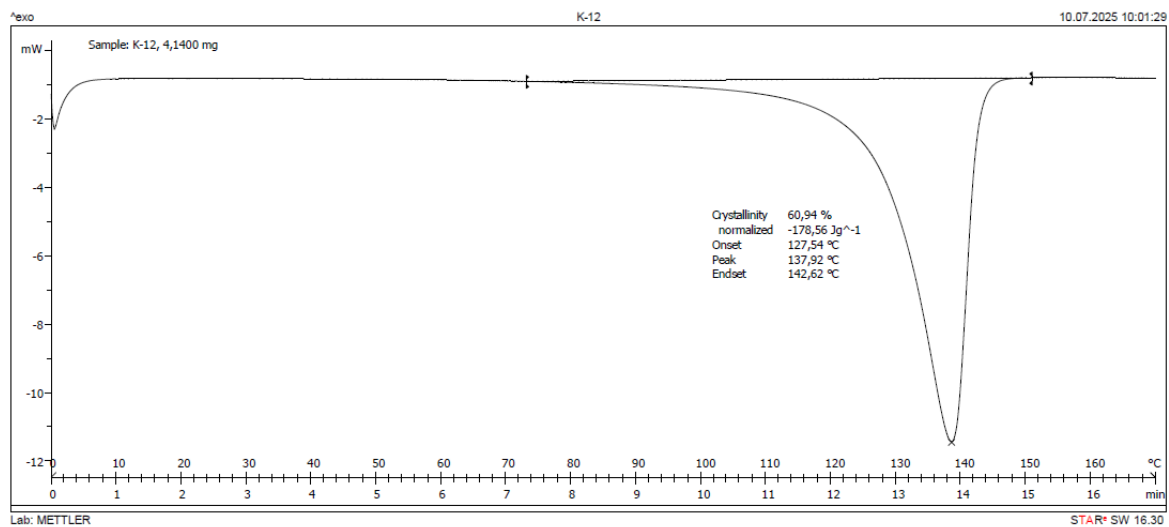

Figure S9. DSC curve of K12.

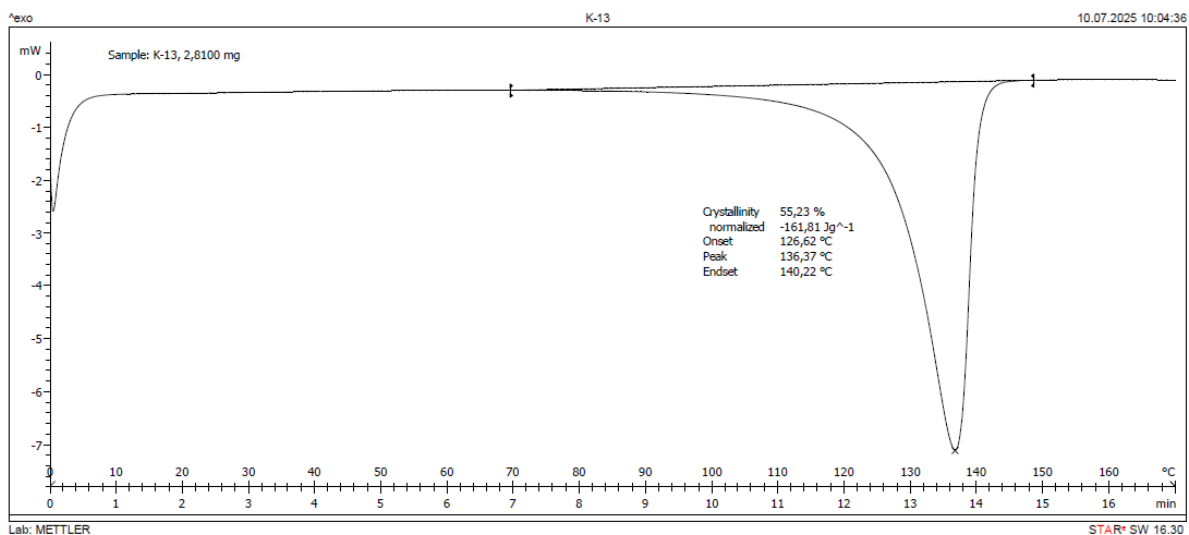

**Figure S10.** DSC curve of K13.

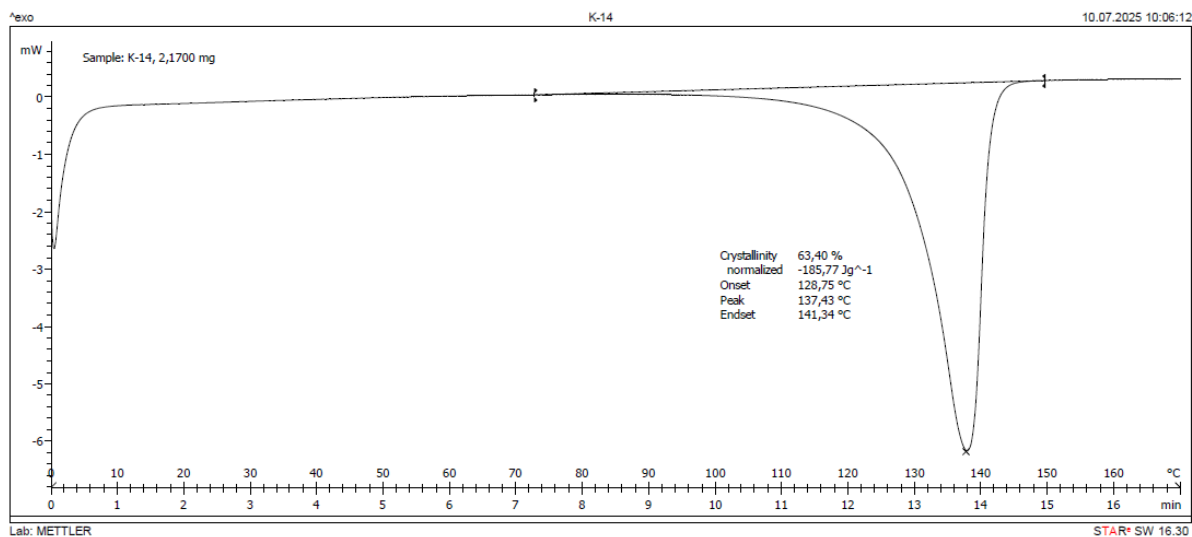

**Figure S11.** DSC curve of K14.

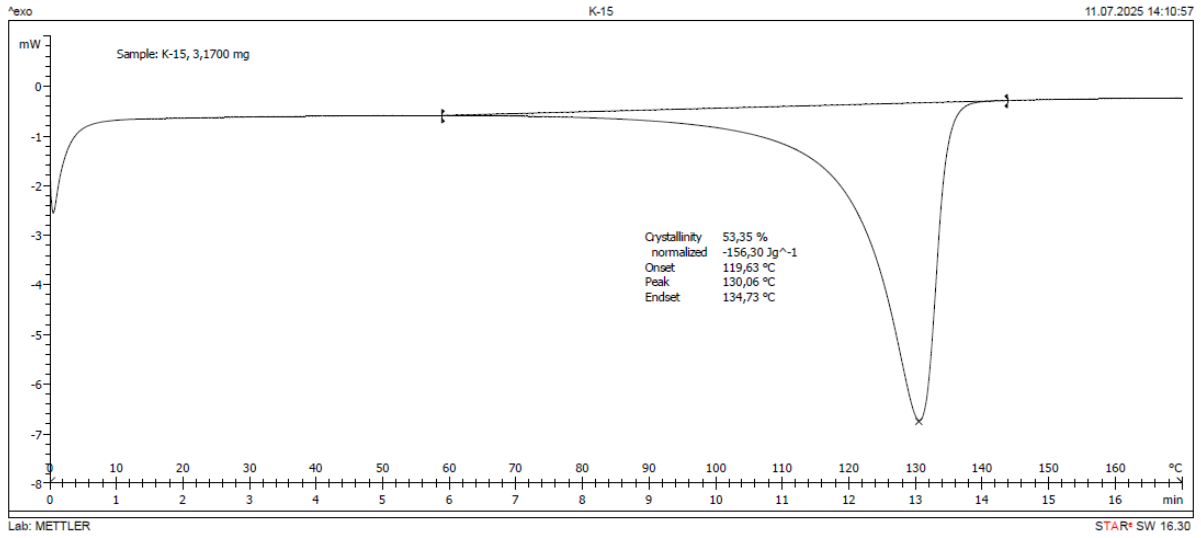

Figure S12. DSC curve of K15.

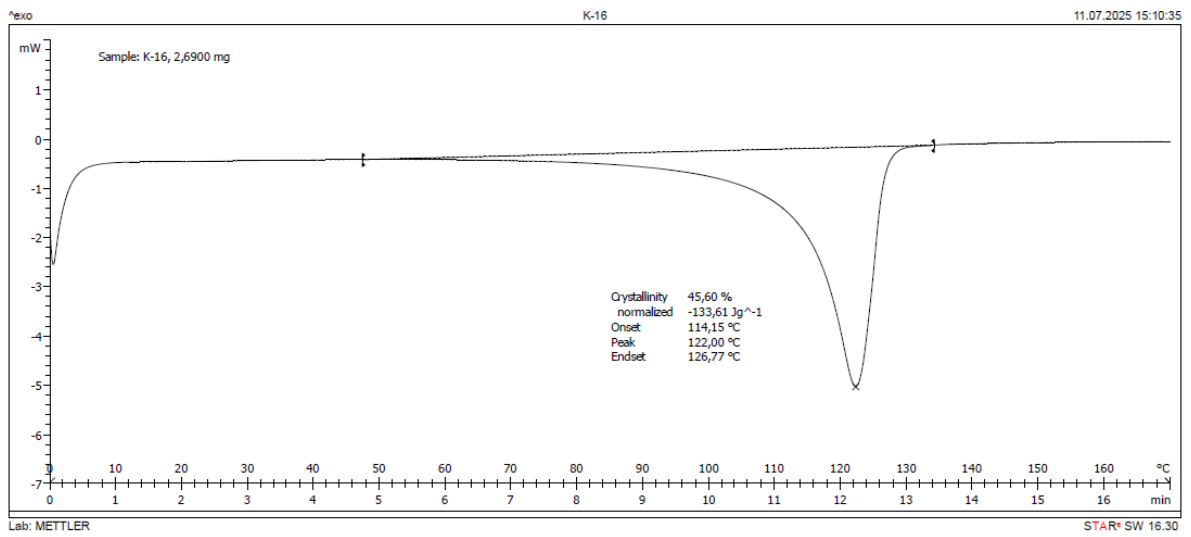

Figure S13. DSC curve of K16.

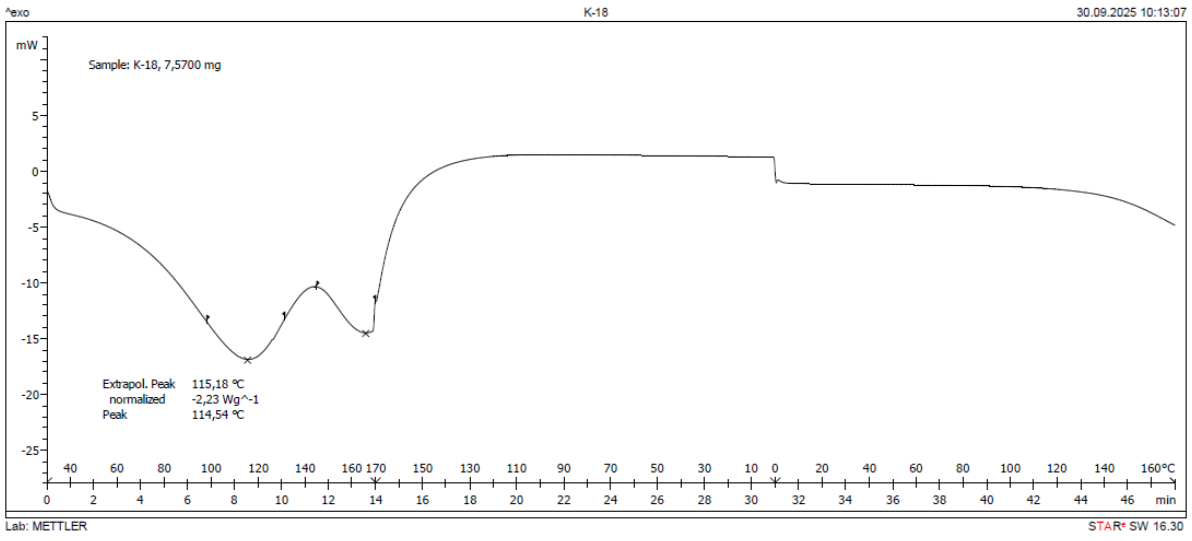

Figure S14. DSC curve of K18.

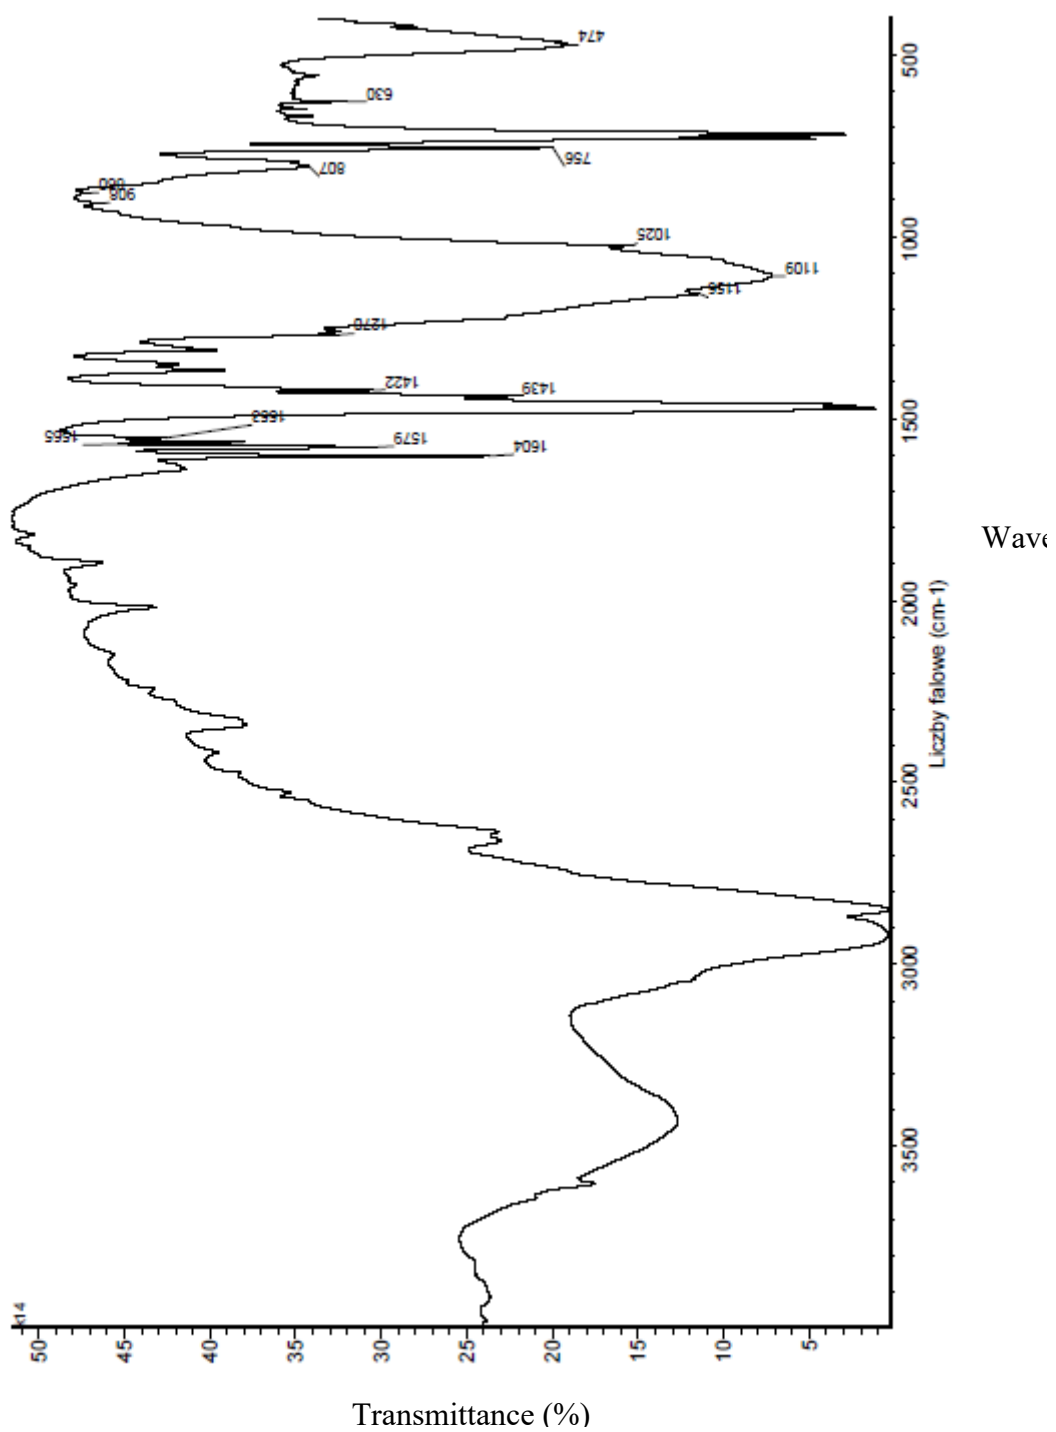

Figure S15. FT-IR spectra of K14.

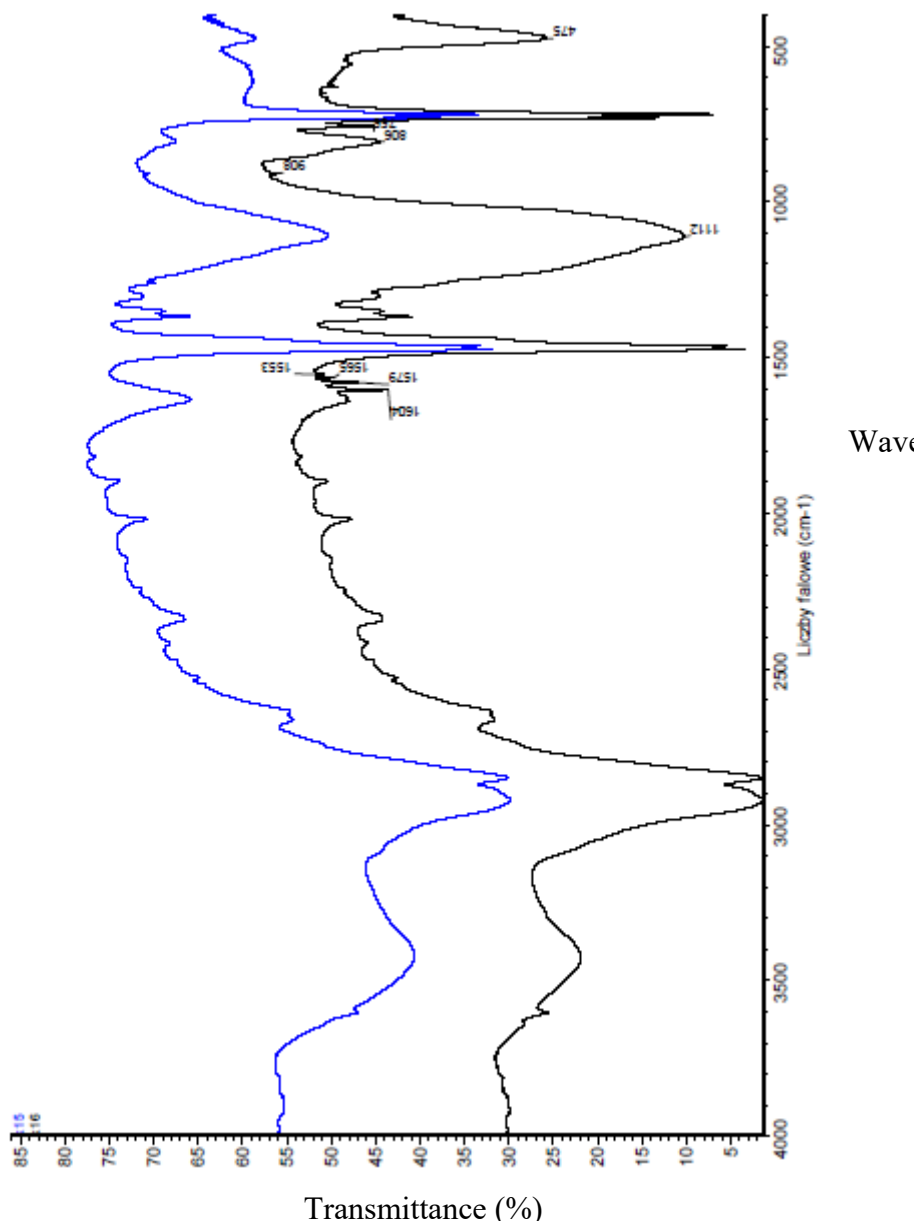

Figure S16. FT-IR spectra of K15 and K16.

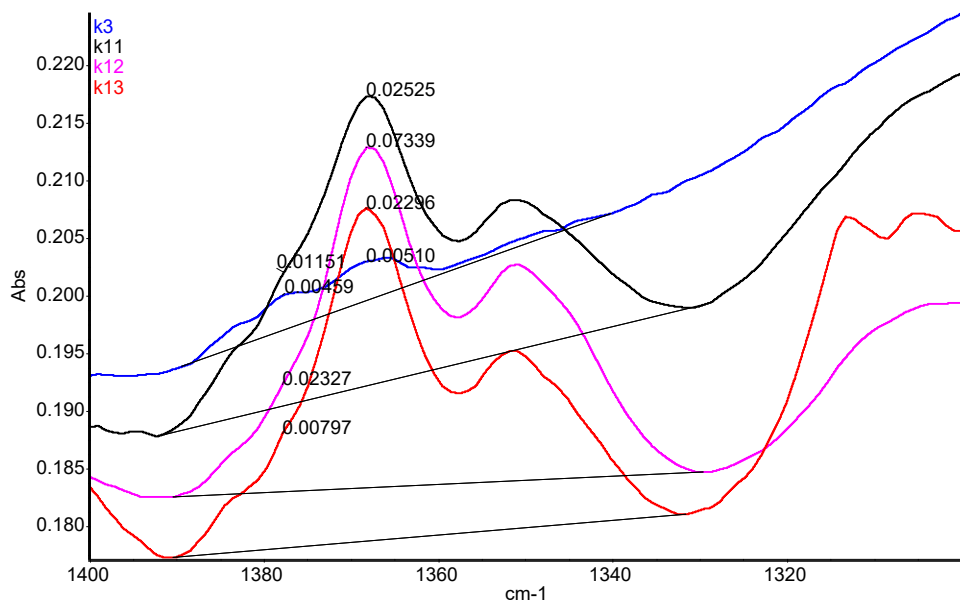

**Figure S17.** FT-IR spectra of K3, K11, K12 and K13.

**Table S1.** Selected X-ray data collection, processing and refinement parameters for the evaluated crystal structures of Rh1 and Rh2.

| <i>Data set</i>                                                      | <b>Rh1</b> (1 <sup>st</sup> data set)                             | <b>Rh1</b> (2 <sup>nd</sup> data set) | <b>Rh2</b> (1 <sup>st</sup> data set)                                                | <b>Rh2</b> (2 <sup>nd</sup> data set) |
|----------------------------------------------------------------------|-------------------------------------------------------------------|---------------------------------------|--------------------------------------------------------------------------------------|---------------------------------------|
| Formula                                                              | C <sub>24</sub> H <sub>22</sub> N <sub>3</sub> O <sub>4</sub> RhS |                                       | C <sub>19</sub> H <sub>11</sub> N <sub>3</sub> O <sub>4</sub> RhS + H <sub>2</sub> O |                                       |
| Formula mass, <i>M</i> / a.u.                                        | 551.42                                                            |                                       | 498.29                                                                               |                                       |
| Crystal system                                                       | orthorhombic                                                      |                                       | monoclinic                                                                           |                                       |
| Space group                                                          | <i>Pbca</i> (No. 61)                                              |                                       | <i>P2</i> <sub>1</sub> / <i>c</i> (No. 14)                                           |                                       |
| <i>Z</i>                                                             | 8                                                                 |                                       | 4                                                                                    |                                       |
| <i>F</i> <sub>000</sub>                                              | 2240                                                              |                                       | 996                                                                                  |                                       |
| Crystal colour & shape                                               | colourless<br>chipped-off plate                                   | yellow<br>small cut plate             | clear light yellow<br>plate                                                          | clear light yellow<br>cut crystal     |
| Crystal size / mm <sup>3</sup>                                       | 0.02×0.06×0.07                                                    | 0.02×0.05×0.08                        | 0.02×0.07×0.08                                                                       | 0.02×0.03×0.09                        |
| <i>T</i> / K                                                         | 100                                                               | 100                                   | 100                                                                                  | 100                                   |
| <i>a</i> / Å                                                         | 10.288(2)                                                         | 10.247(2)                             | 13.670(3)                                                                            | 13.6552(5)                            |
| <i>b</i> / Å                                                         | 15.184(3)                                                         | 15.255(3)                             | 9.858(2)                                                                             | 9.8730(3)                             |
| <i>c</i> / Å                                                         | 27.605(6)                                                         | 27.600(6)                             | 13.826(3)                                                                            | 13.8328(6)                            |
| <i>α</i> / Å                                                         | 90                                                                | 90                                    | 90                                                                                   | 90                                    |
| <i>β</i> / Å                                                         | 90                                                                | 90                                    | 107.76(3)                                                                            | 107.743(4)                            |
| <i>γ</i> / Å                                                         | 90                                                                | 90                                    | 90                                                                                   | 90                                    |
| <i>V</i> / Å <sup>3</sup>                                            | 4312.1(15)                                                        | 4314.5(15)                            | 1774.4(7)                                                                            | 1776.20(12)                           |
| <i>d</i> <sub>calc</sub> / g·cm <sup>-3</sup>                        | 1.6988                                                            | 1.6978                                | 1.8653                                                                               | 1.8634                                |
| <i>θ</i> range                                                       | 3.20–76.35°                                                       | 3.20–76.35°                           | 3.39–76.34°                                                                          | 3.40–73.92°                           |
| Absorption coefficient,<br><i>μ</i> / mm <sup>-1</sup> (radiation)   | 7.639 (Cu-K <sub>α</sub> )                                        | 7.635 (Cu-K <sub>α</sub> )            | 9.249 (Cu-K <sub>α</sub> )                                                           | 9.239 (Cu-K <sub>α</sub> )            |
| No. of reflections collected<br>/ unique (redundancy)                | 35477 / 4499<br>(7.9)                                             | 16076 / 4038<br>(4.0)                 | 18885 / 3717<br>(5.1)                                                                | 18814 / 3557<br>(5.3)                 |
| <i>R</i> <sub>int</sub>                                              | 2.82%                                                             | 3.57%                                 | 4.20%                                                                                | 4.13%                                 |
| No. of reflections with<br><i>I</i> > 3σ( <i>I</i> ) (% of all data) | 3715 (83%)                                                        | 3121 (77%)                            | 3213 (86%)                                                                           | 3066 (86%)                            |
| No. of parameters<br>/ restraints / constraints                      | 280 / 2 / 106                                                     | 280 / 2 / 106                         | 268 / 2 / 46                                                                         | 268 / 2 / 46                          |
| <i>R</i> [ <i>F</i> ] ( <i>I</i> > 3σ( <i>I</i> ))                   | 5.50%                                                             | 6.13%                                 | 3.20%                                                                                | 3.10%                                 |
| <i>wR</i> [ <i>F</i> <sup>2</sup> ] (all data)                       | 13.00%                                                            | 13.76%                                | 9.37%                                                                                | 7.66%                                 |
| <i>ρ</i> <sup>min/max</sup> <sub>res</sub> / e·Å <sup>-3</sup>       | -3.01 / +4.05                                                     | -3.04 / +5.08                         | -0.82 / +1.40                                                                        | -0.63 / +1.32                         |
| CCDC code                                                            | 2498557                                                           | 2498558                               | 2498559                                                                              | 2498560                               |

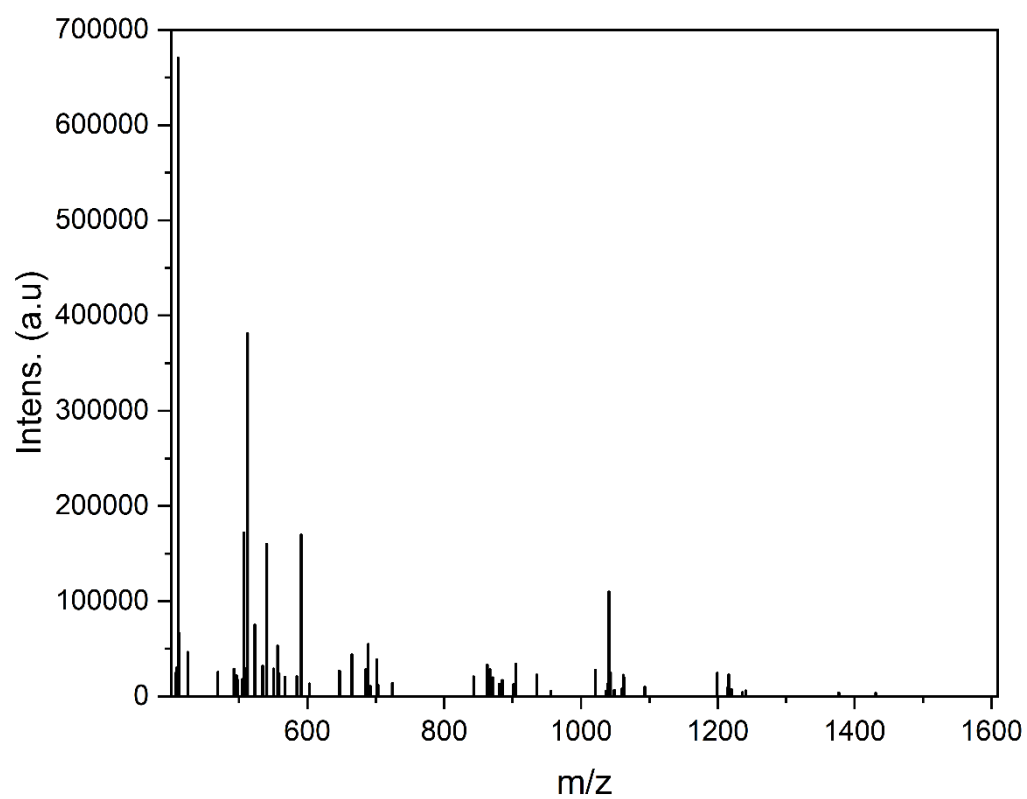

**Figure S18.** MALDI-TOF-MS spectrum of the K17 sample

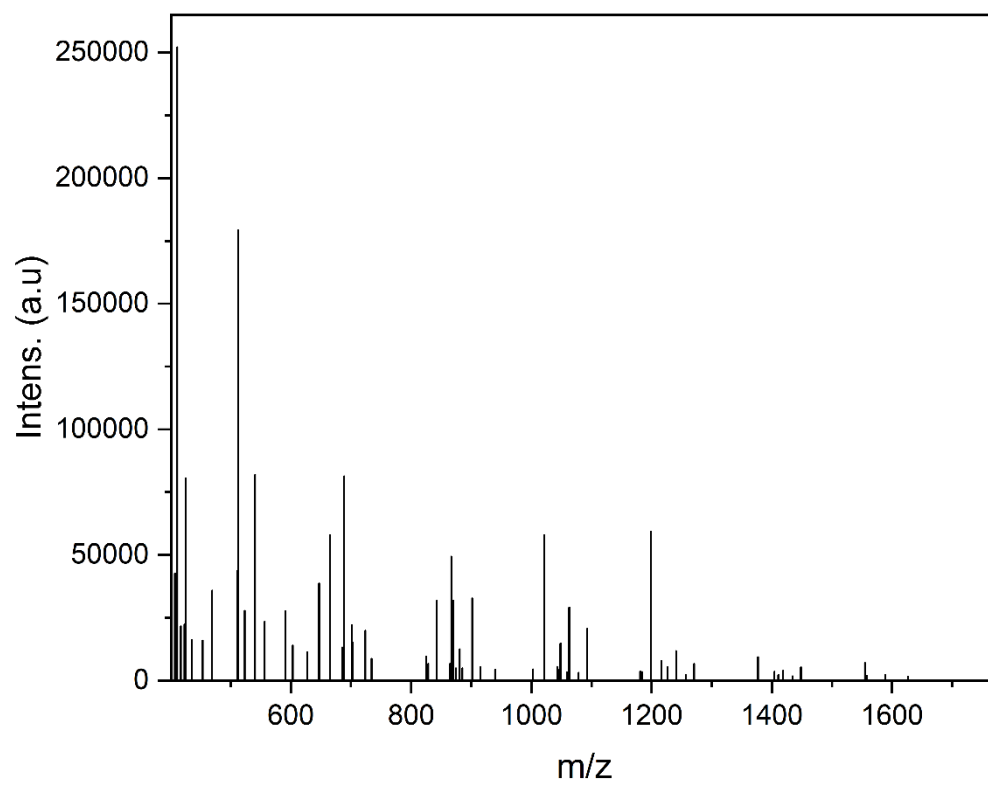

**Figure S19.** MALDI-TOF-MS spectrum of the K18 sample.

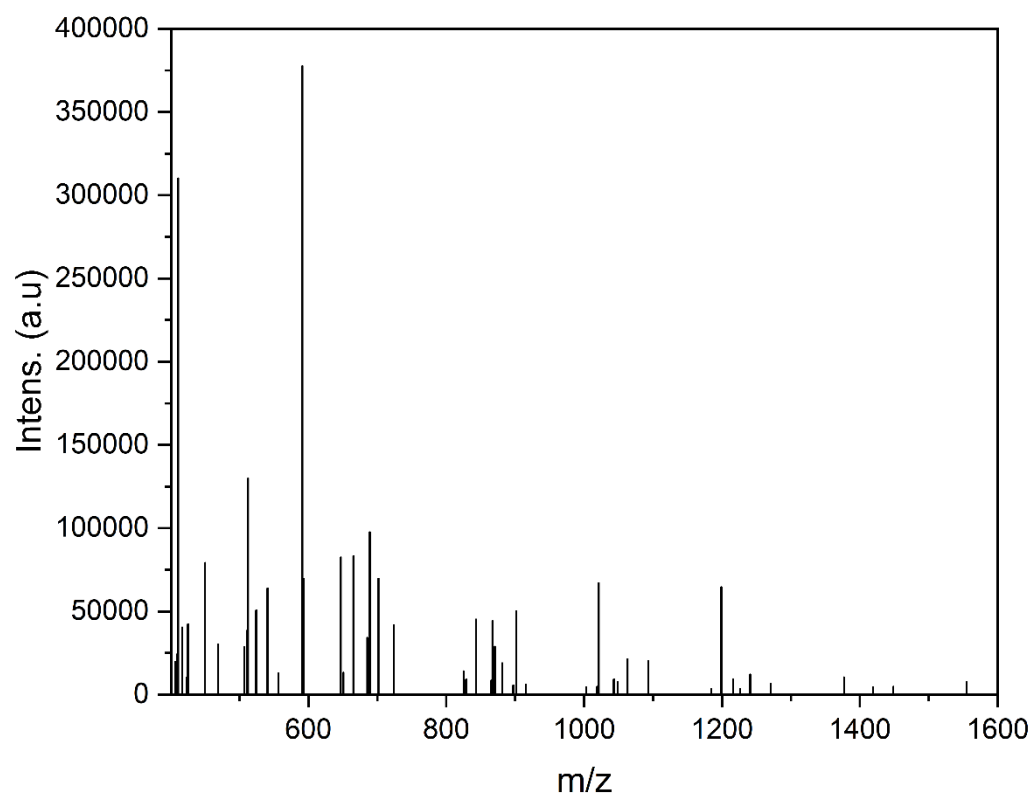

**Figure S20.** MALDI-TOF-MS spectrum of the K19 sample.

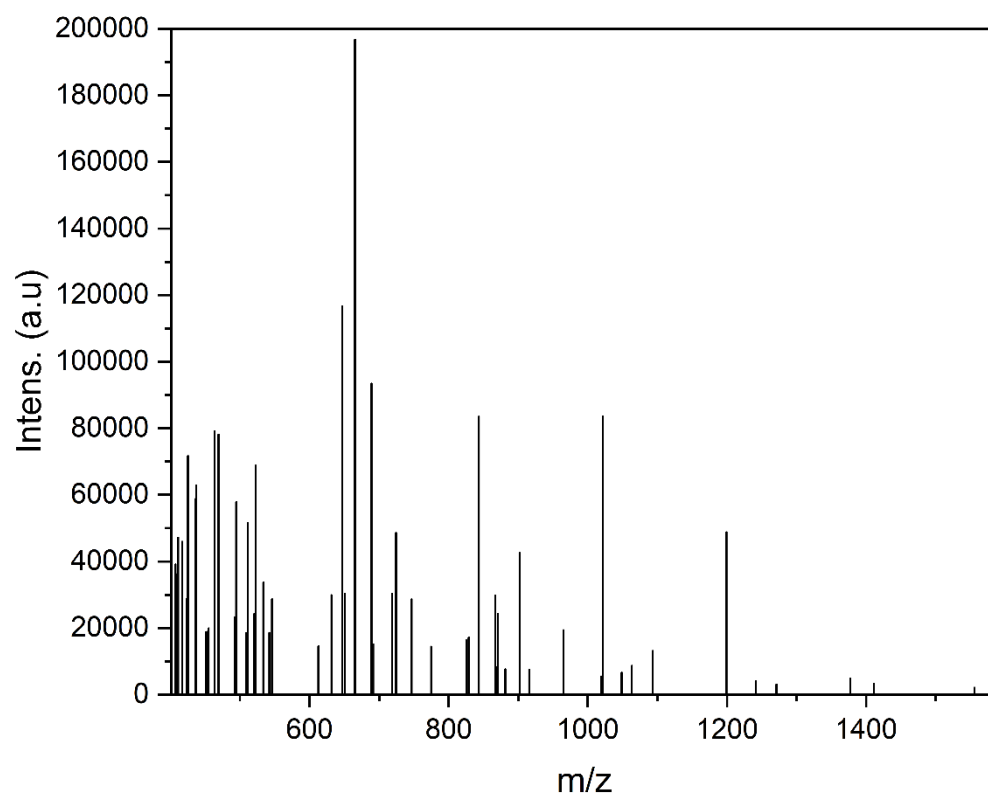

**Figure S21.** MALDI-TOF-MS spectrum of the K20 sample.

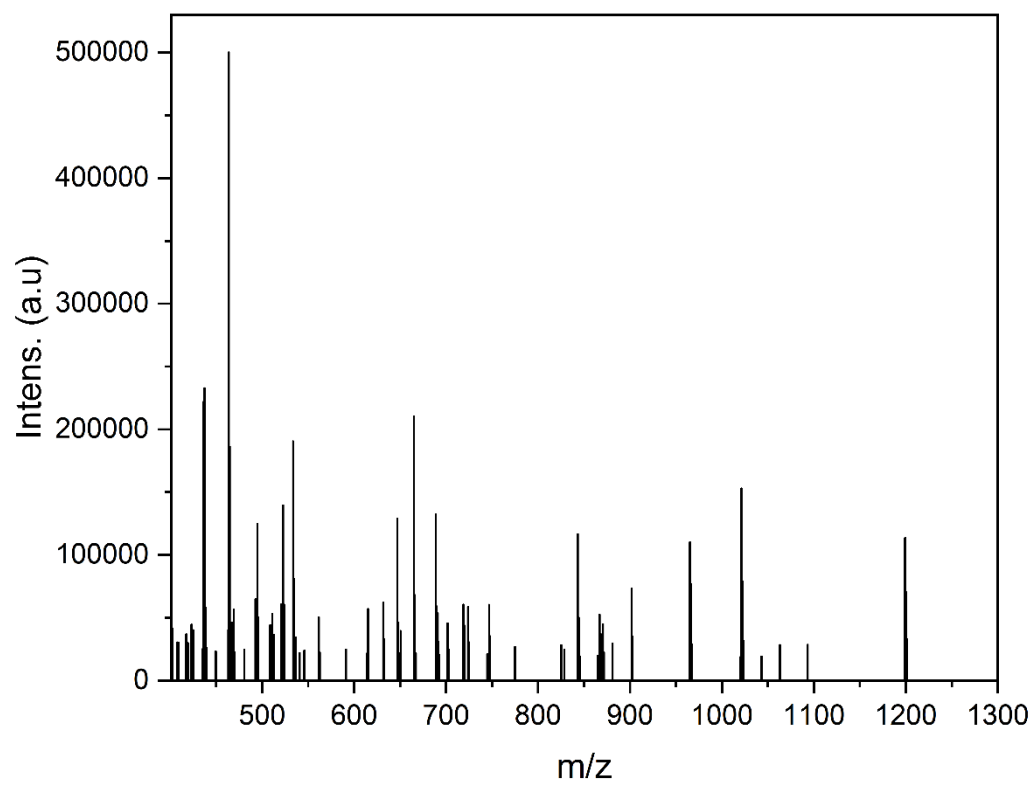

**Figure S22.** MALDI-TOF-MS spectrum of the K21 sample.

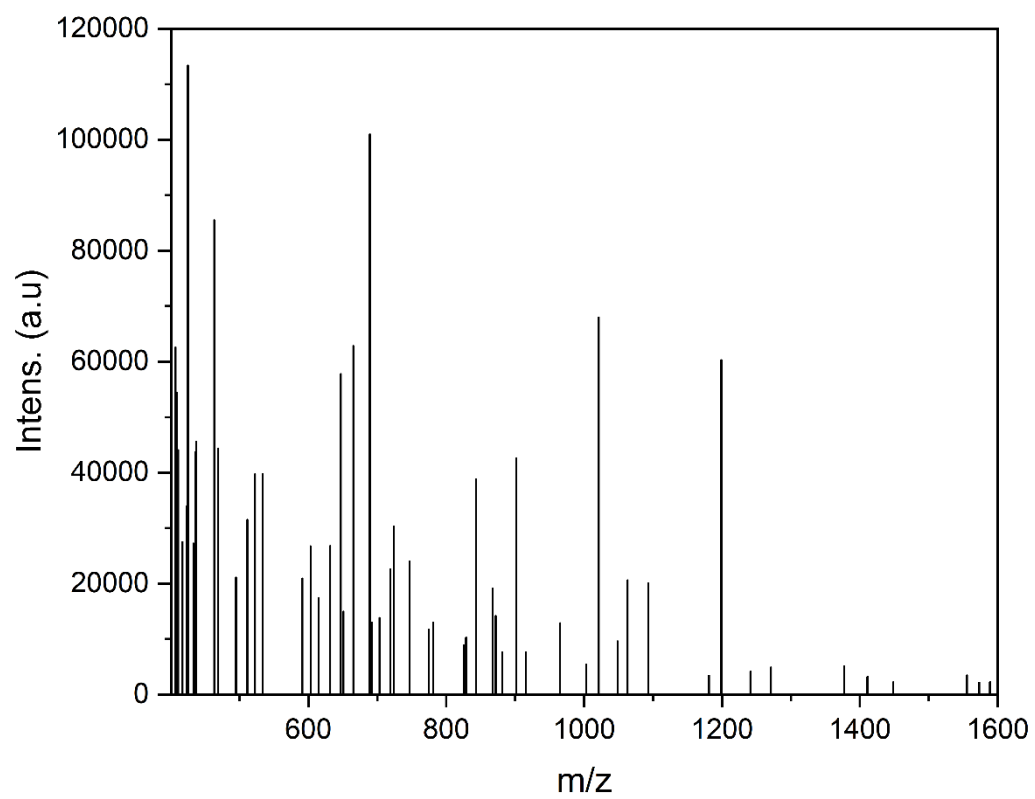

**Figure S23.** MALDI-TOF-MS spectrum of the K22 sample.
